# Supplementary material
Source: PubMed Central journal article supplement (PMC4103367)

120731DH48-48\_DH116H2Fr2  
DH116H2Fr2 AllMann  
PROTON\_8scans MeOD /DATA/topspin DH48 48

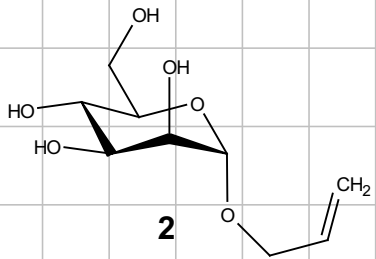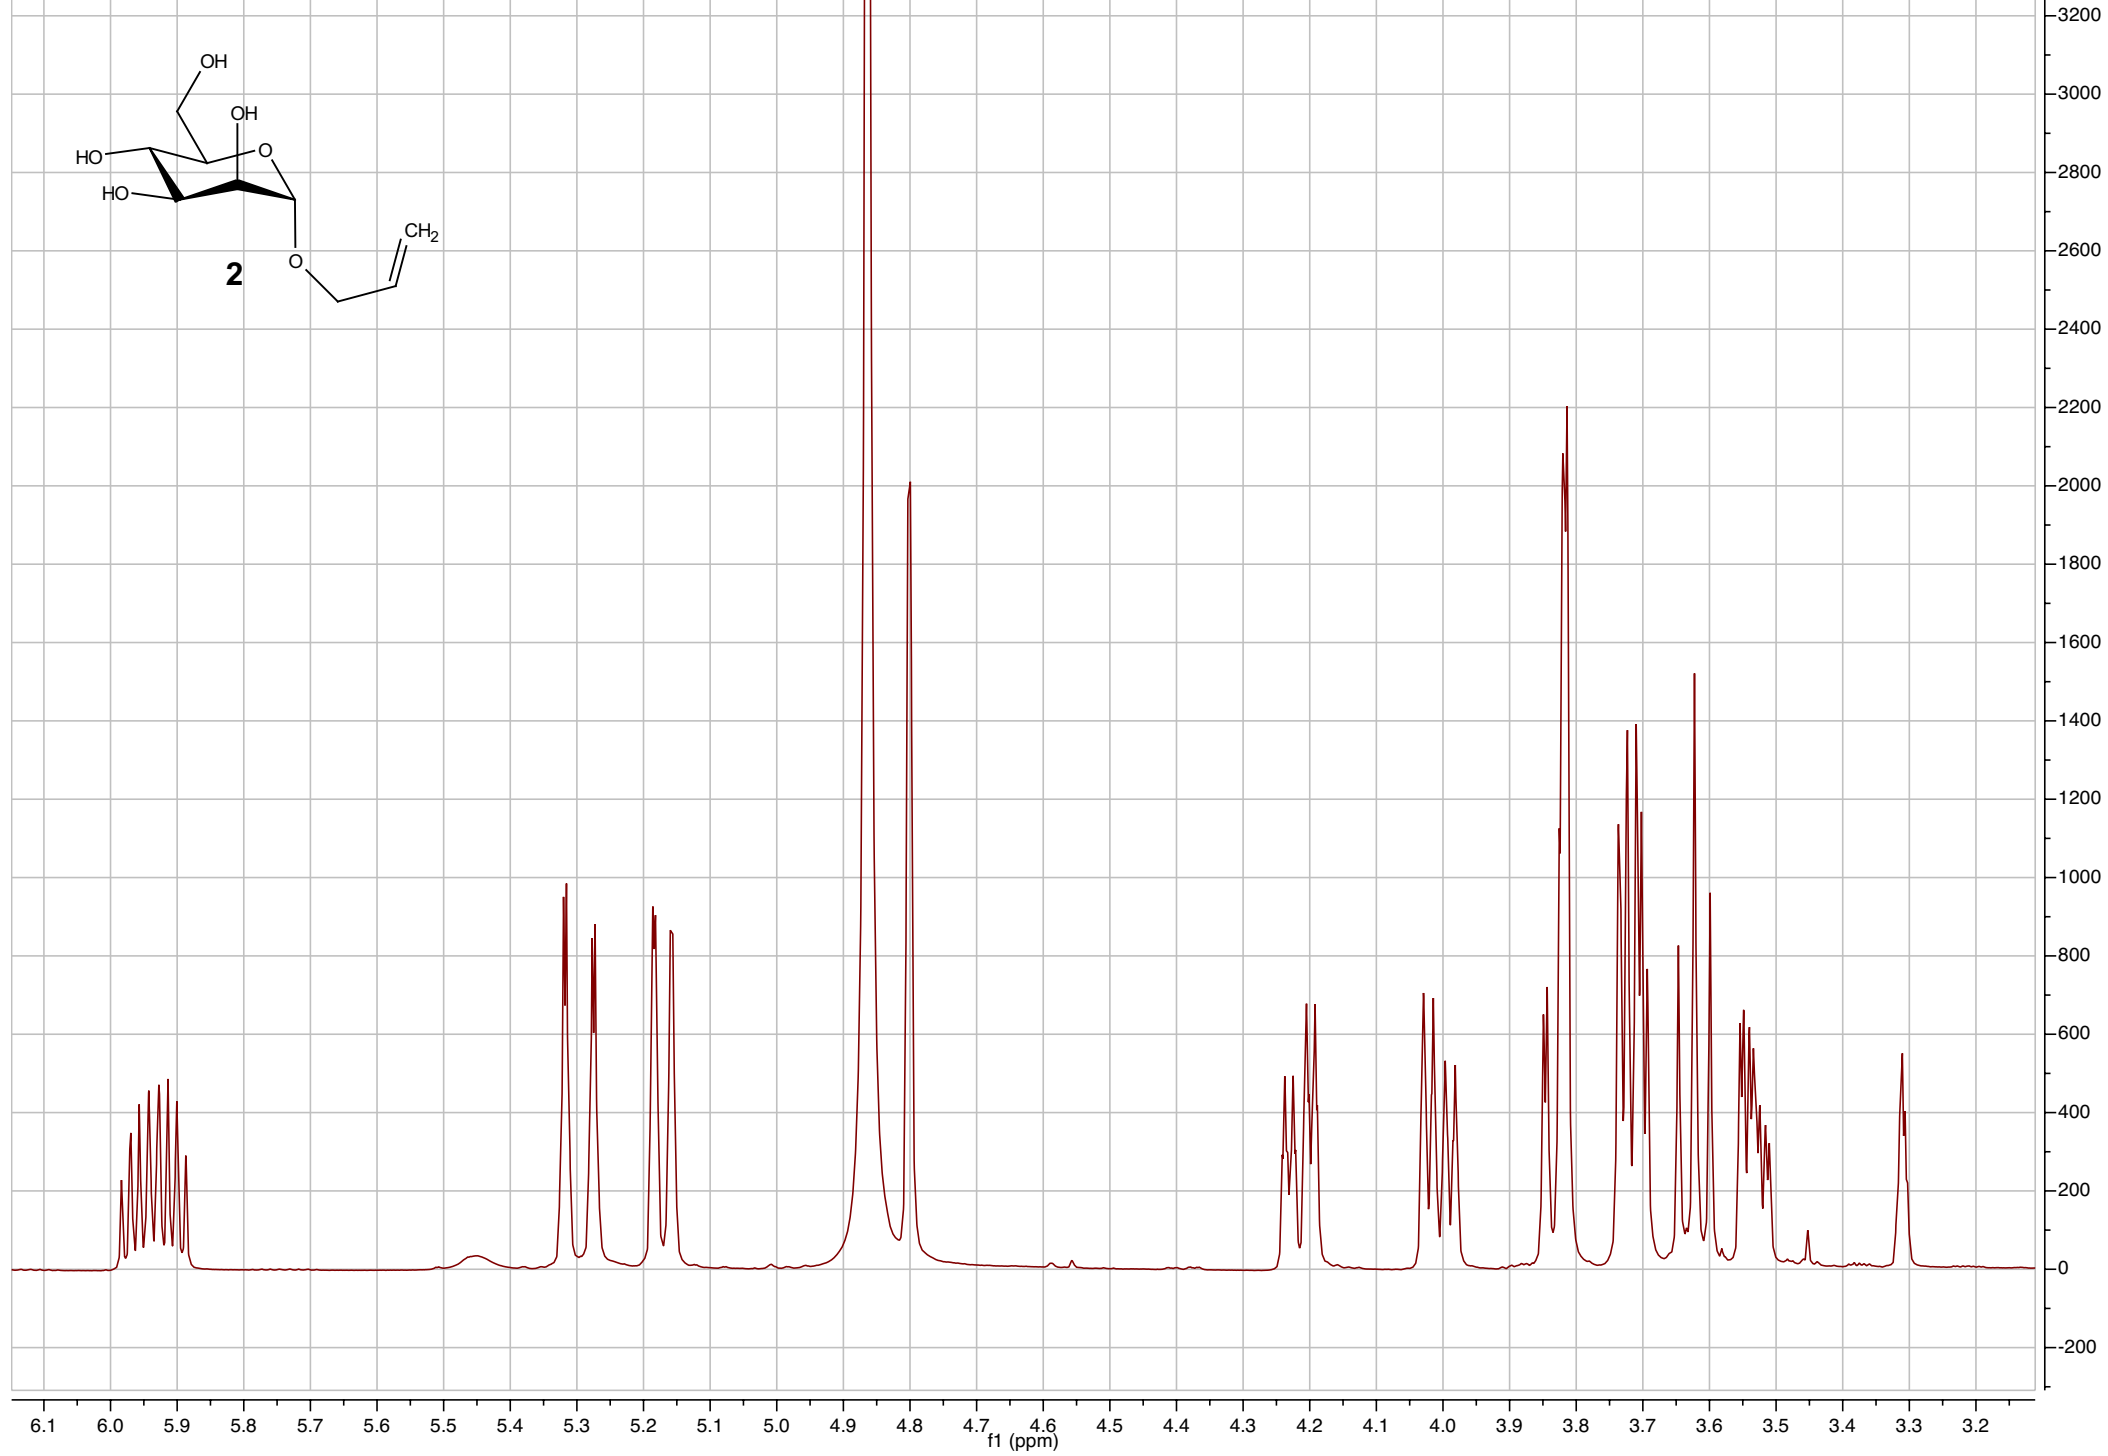

120731DH48-48\_DH116H2Fr2  
DH116H2Fr2 AllMann  
CARBON\_256scans MeOD /DATA/topspin DH48 48

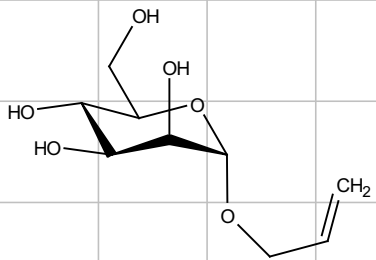

2

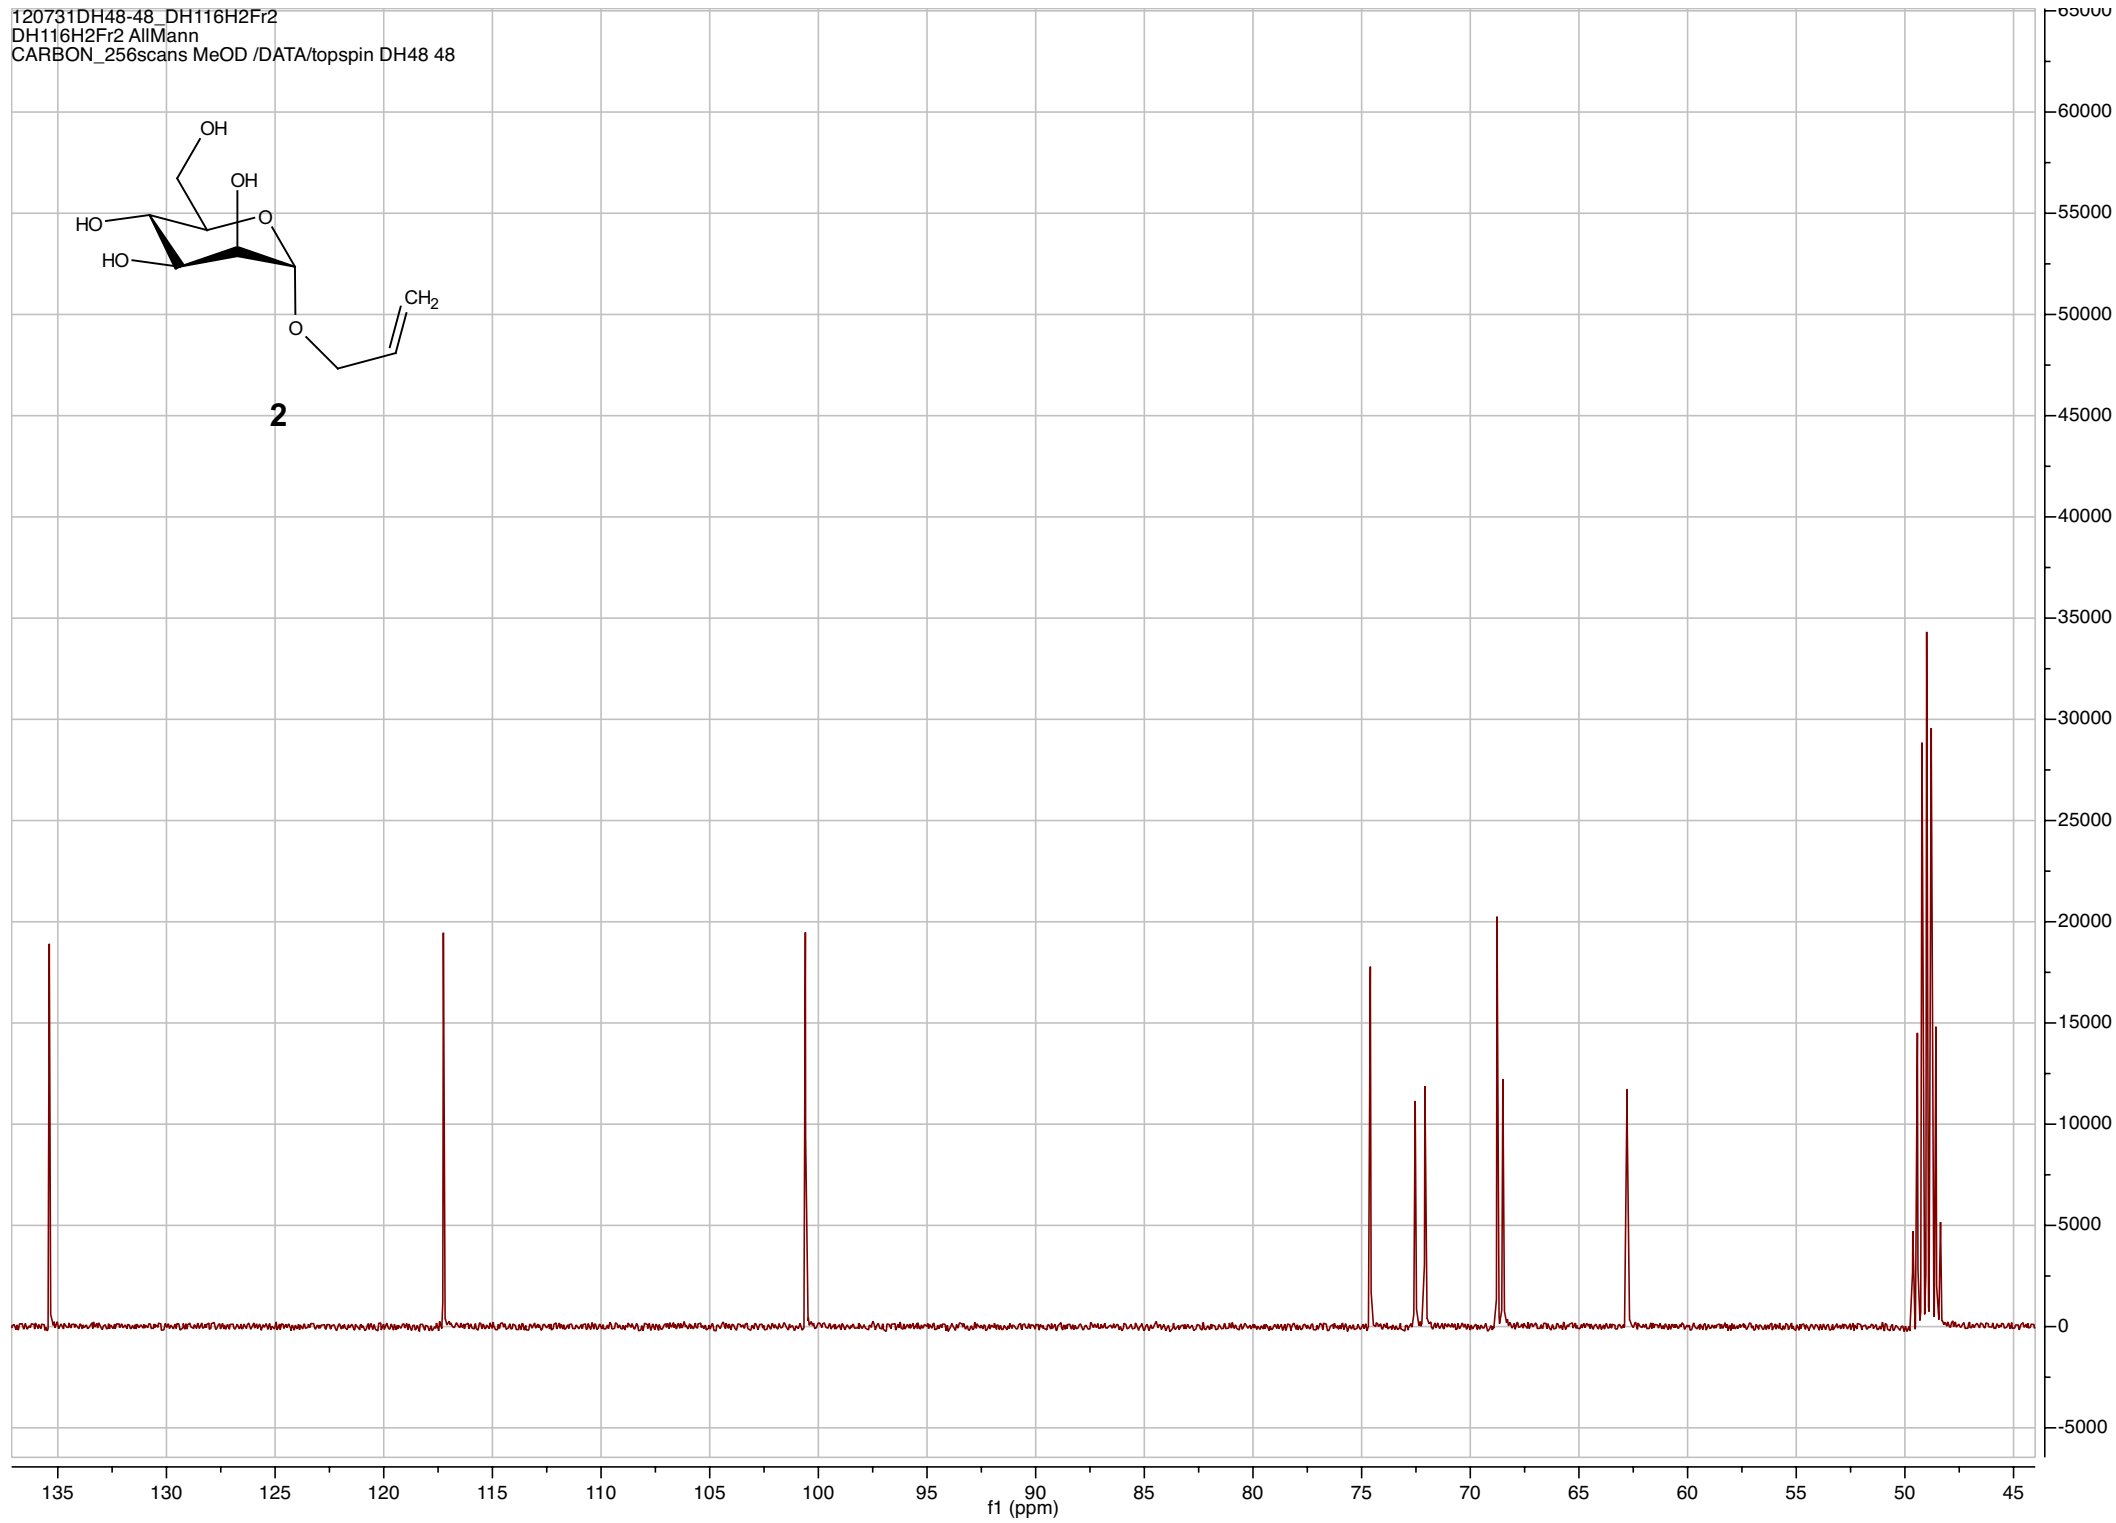

120731DH48-47\_DH116H2Fr1  
DH116H2Fr1 MeAllMann  
PROTON\_8scans MeOD /DATA/topspin DH48 47

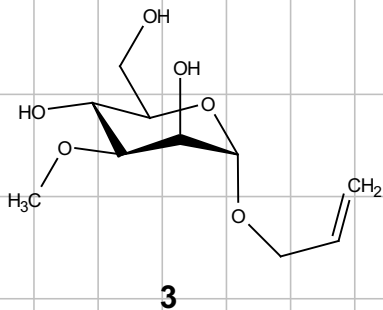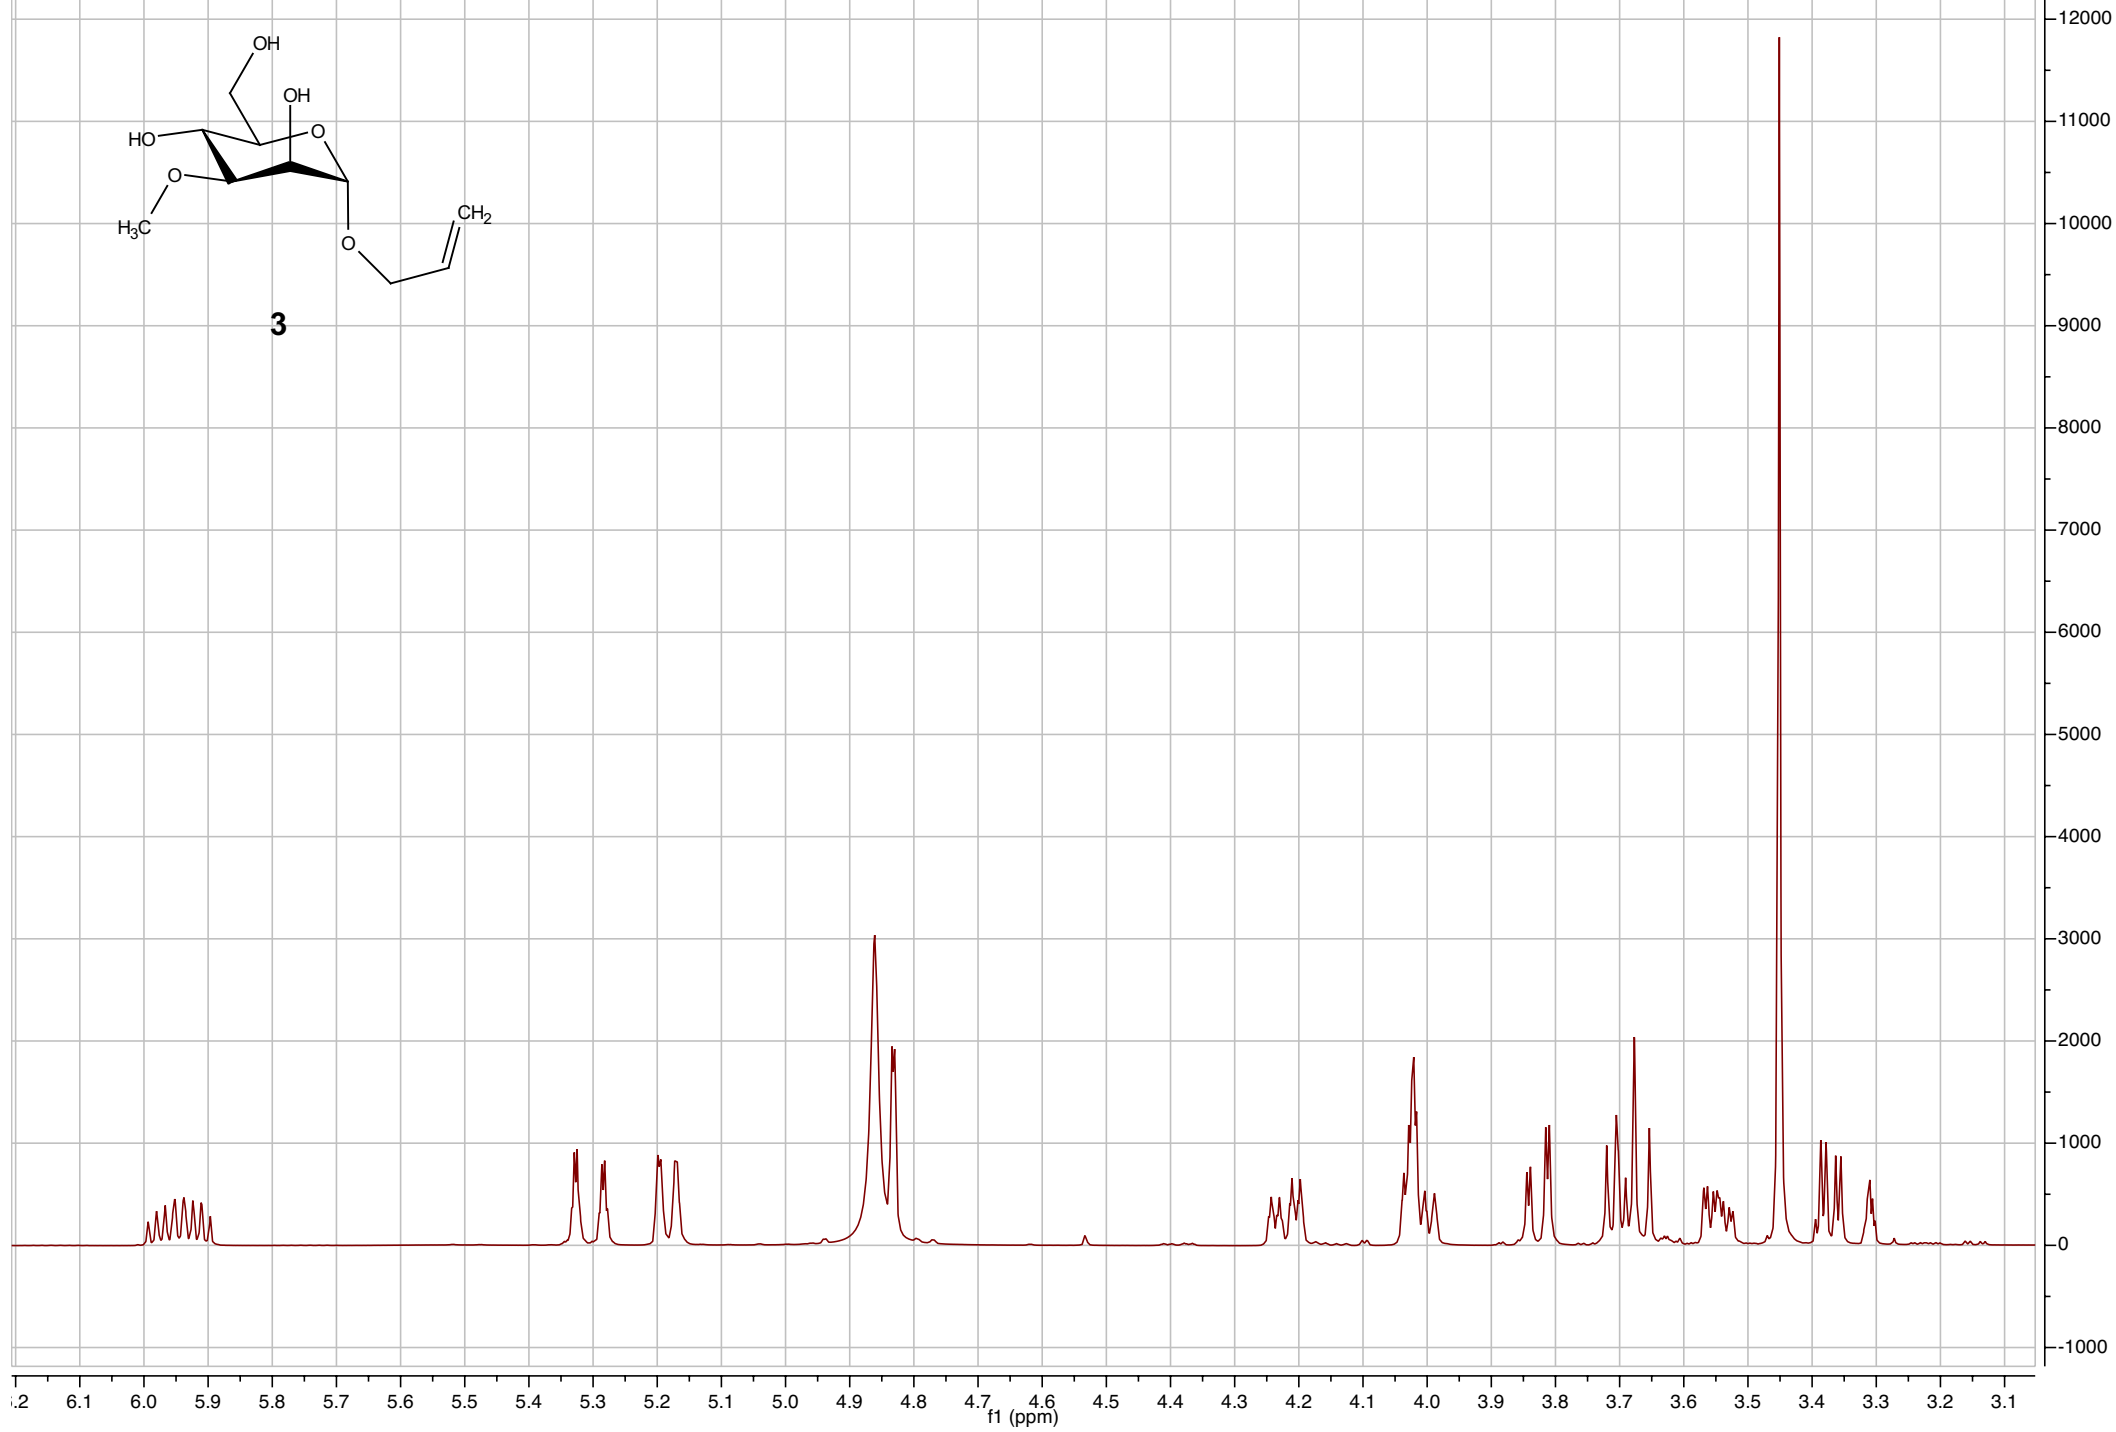

120731DH48-47\_DH116H2Fr1  
DH116H2Fr1 MeAllMann  
CARBON\_256scans MeOD /DATA/topspin DH48 47

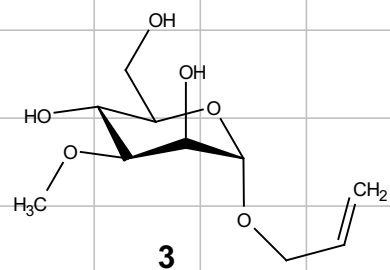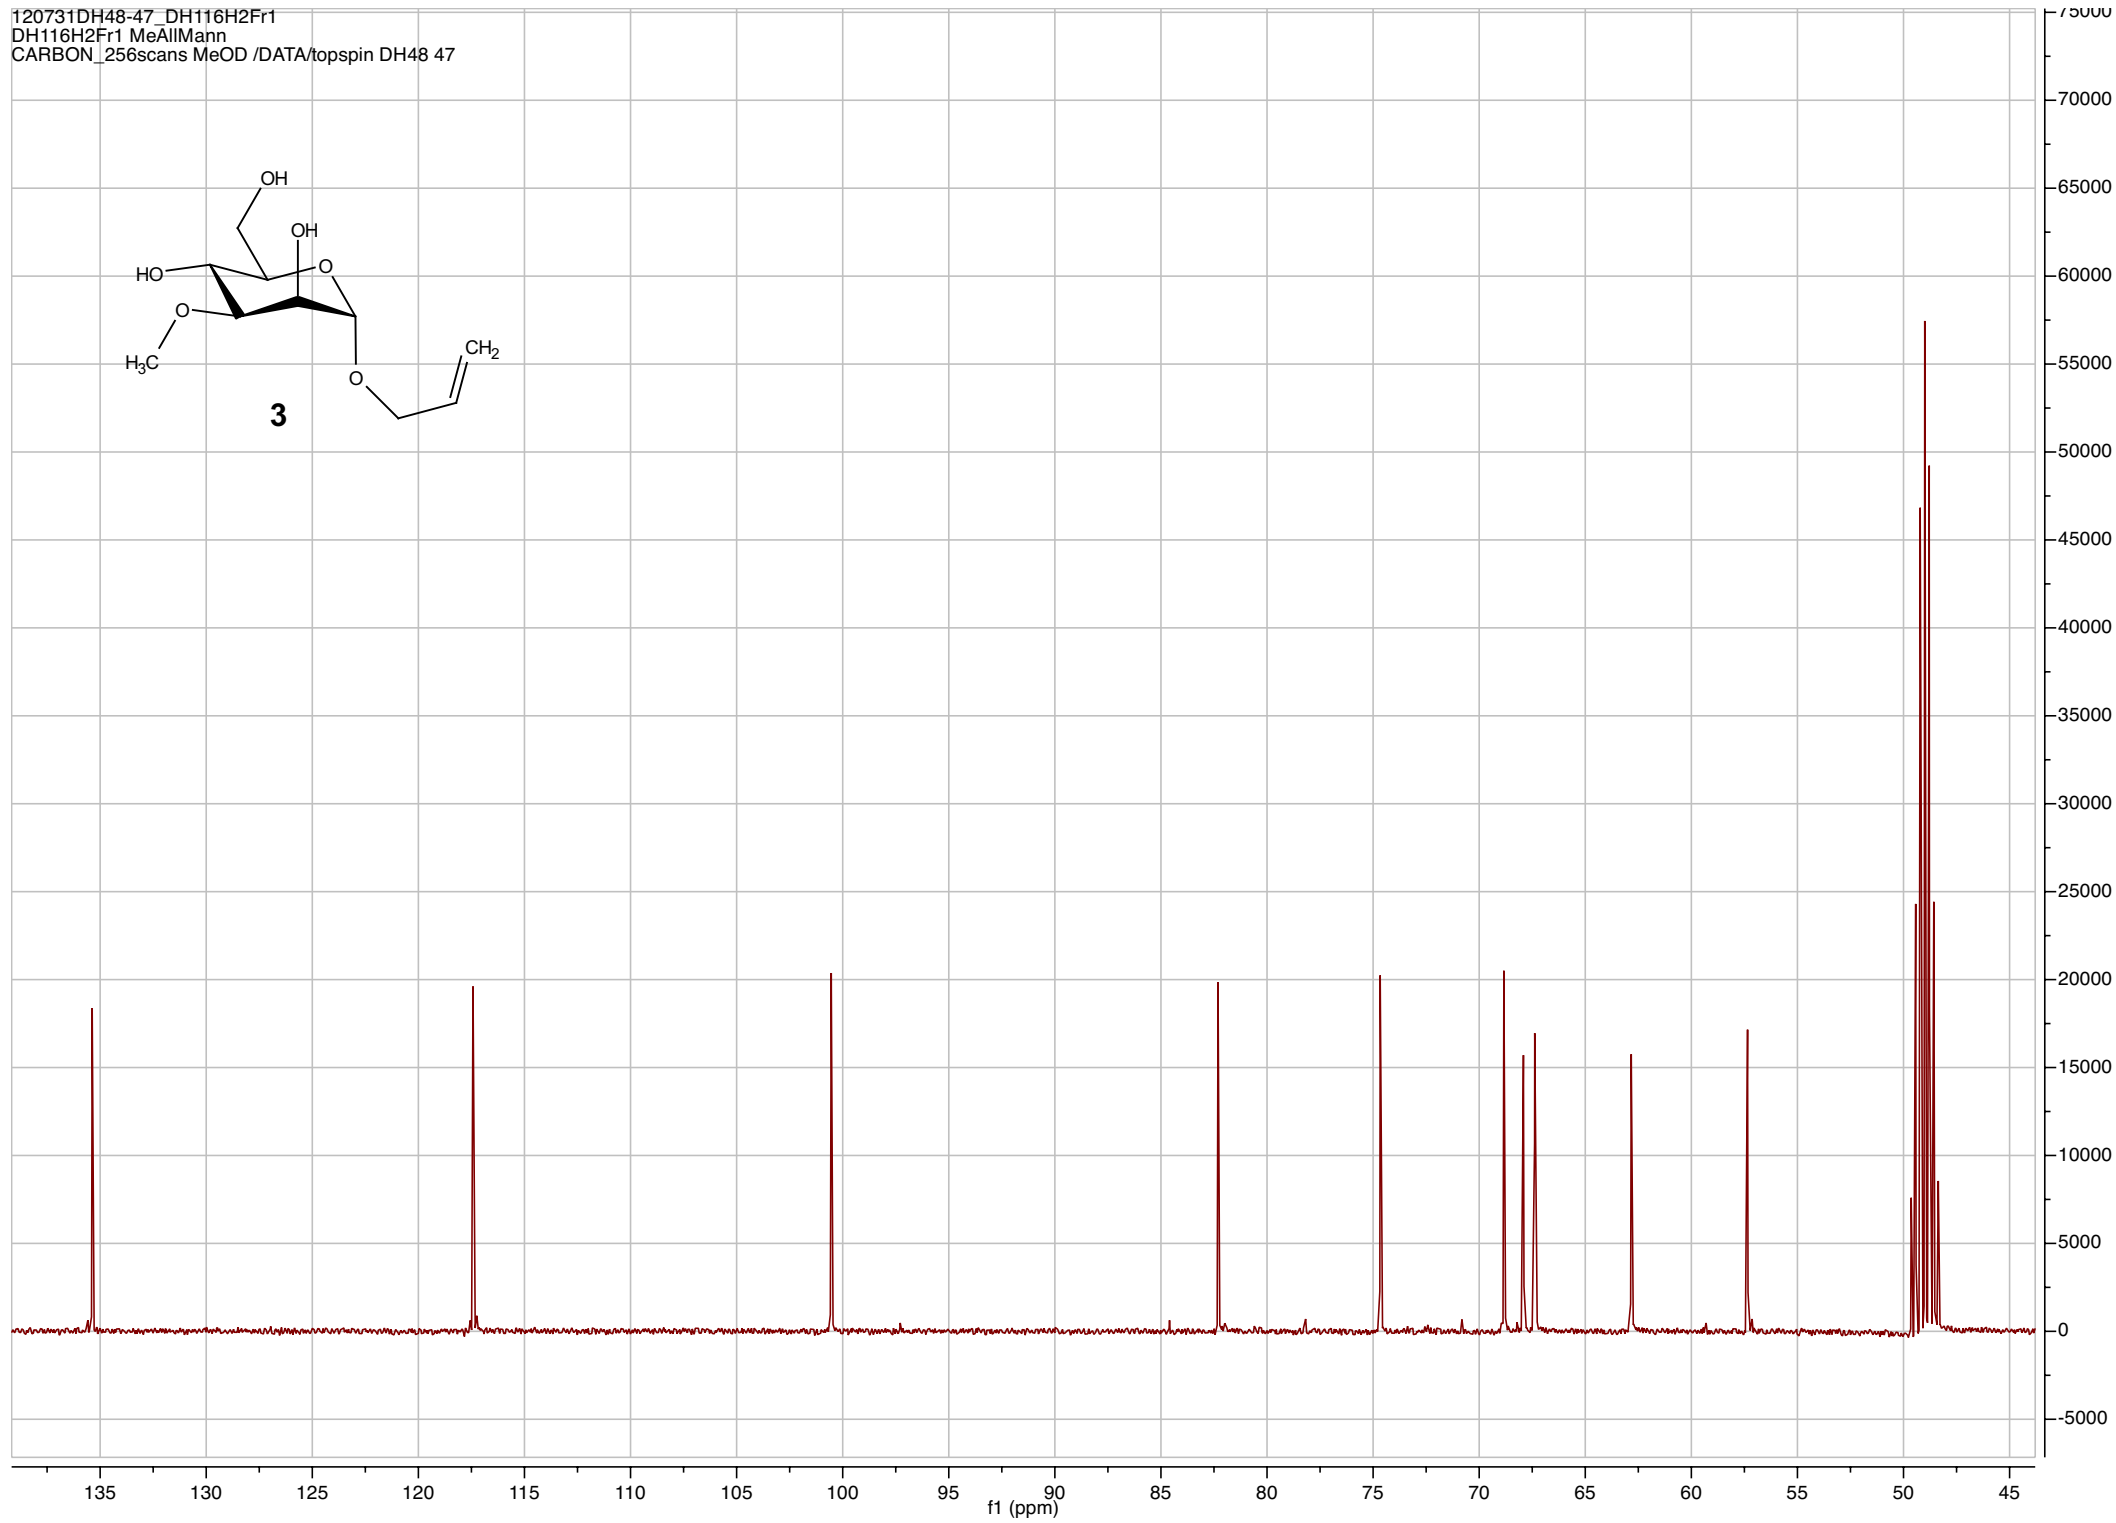

120911DH48-51\_DH127K1  
DH127 K1 All-Fuc  
PROTON MeOD /DATA/topspin DH48 51

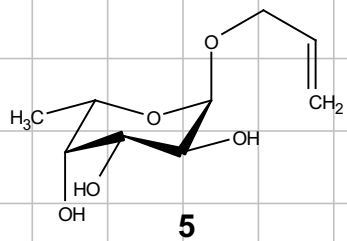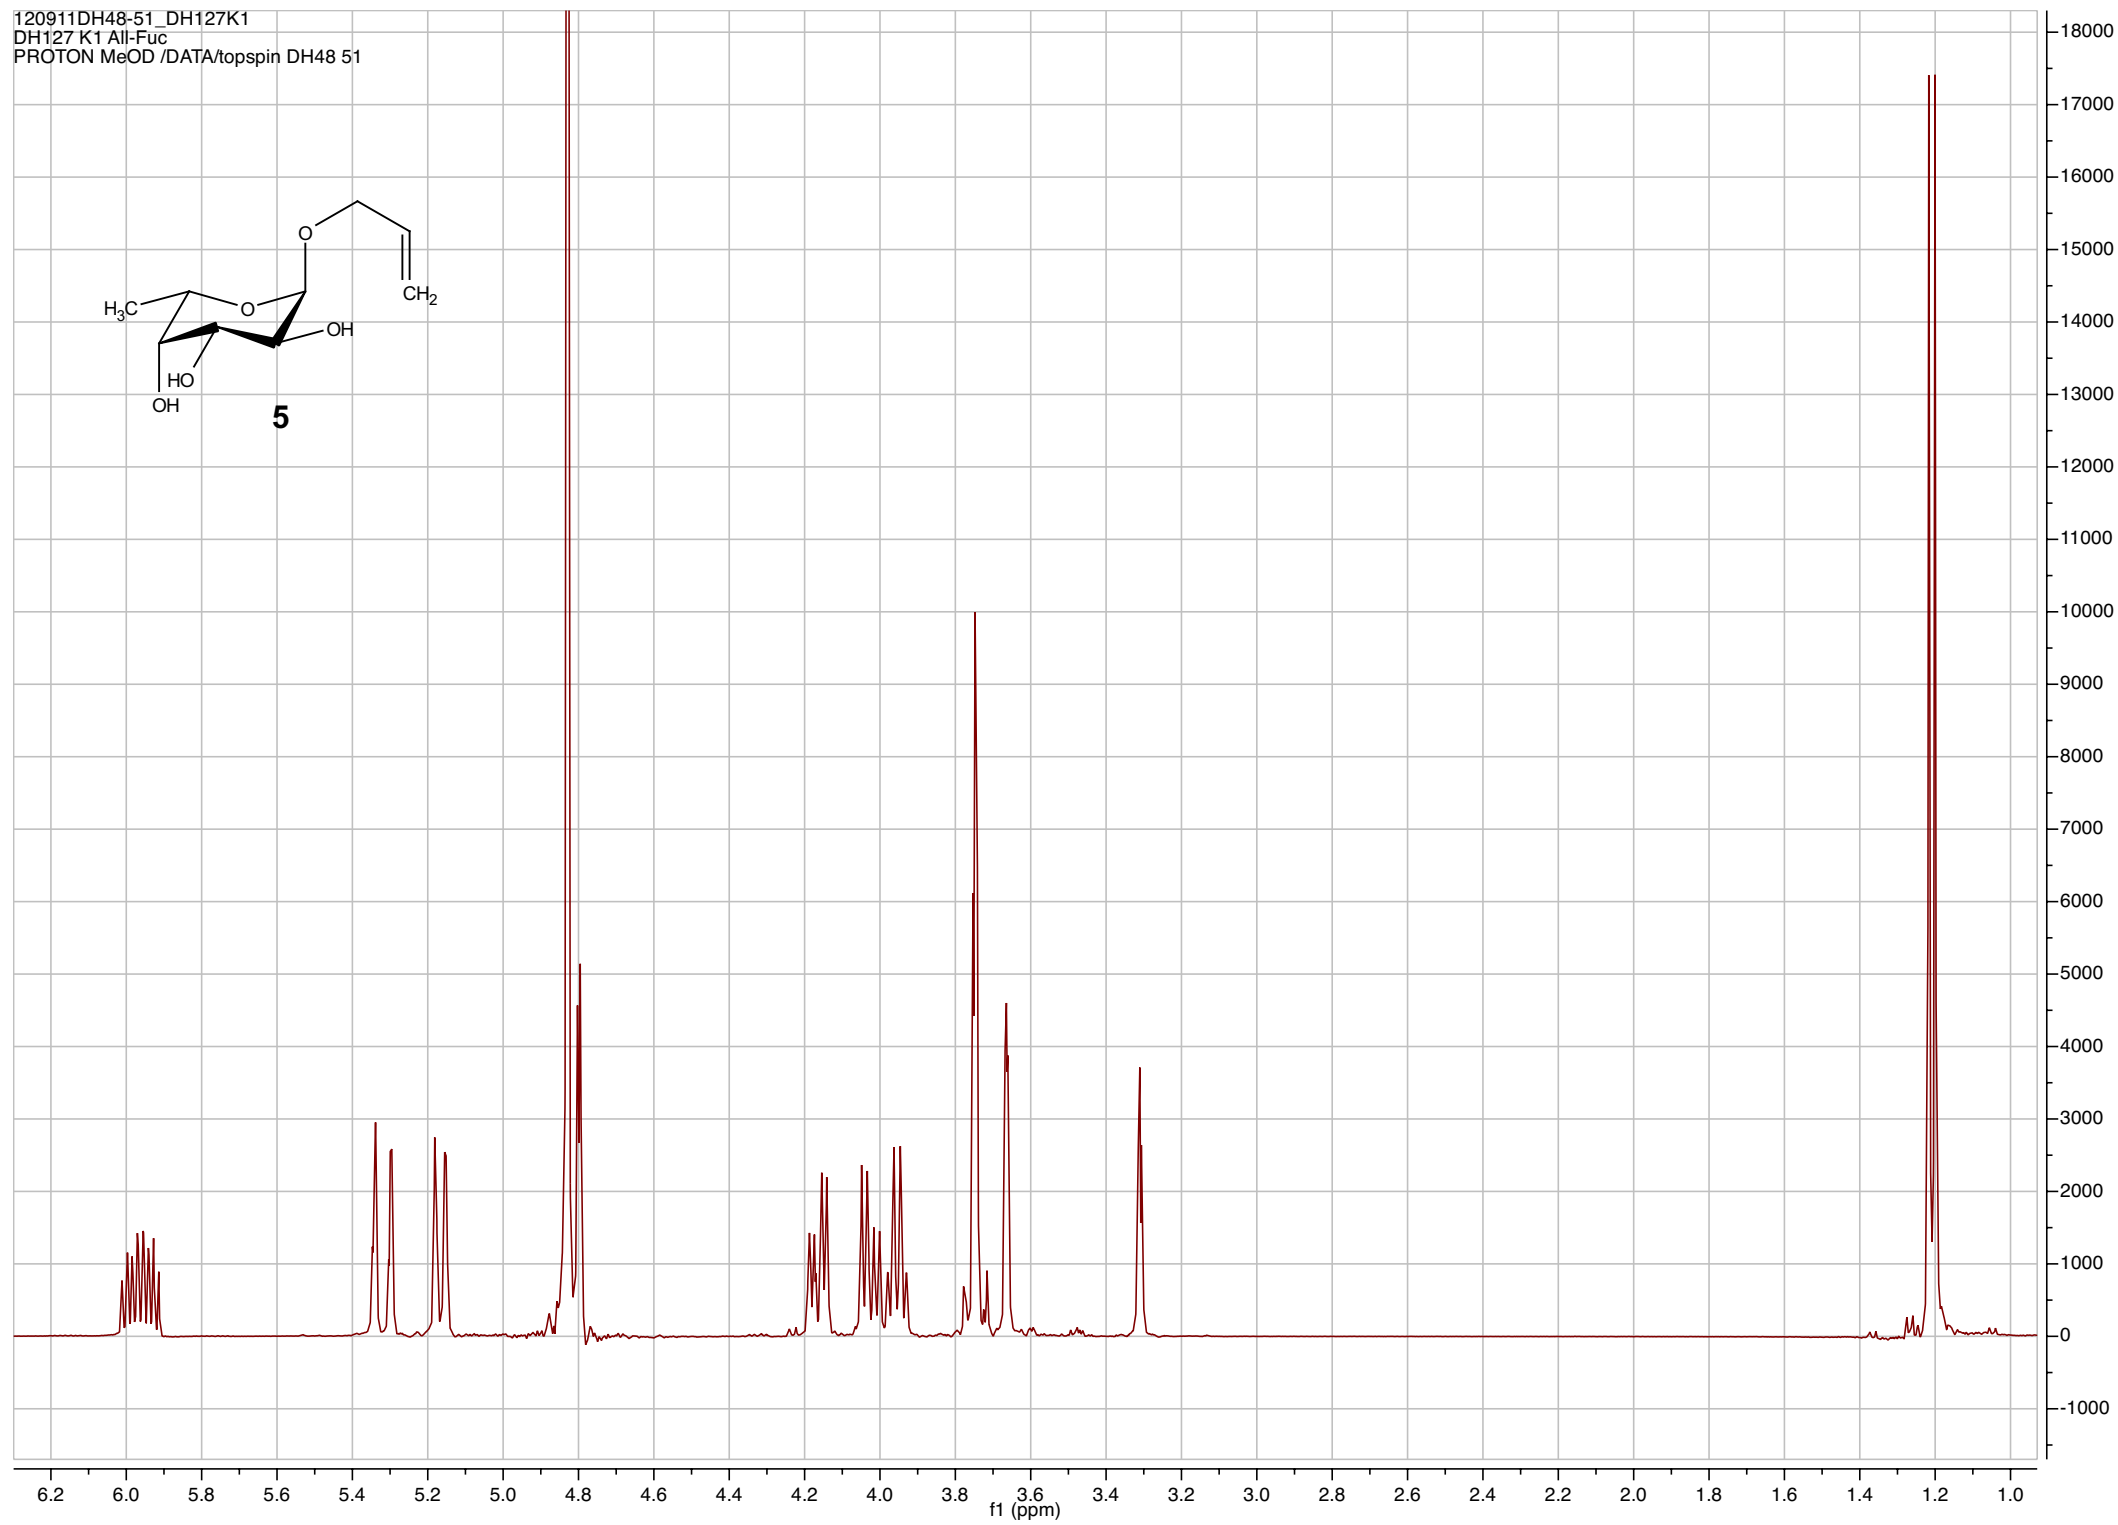

120911DH48-51\_DH127K1  
DH127 K1 All-Fuc  
CARBON\_512scans MeOD /DATA/topspin DH48 51

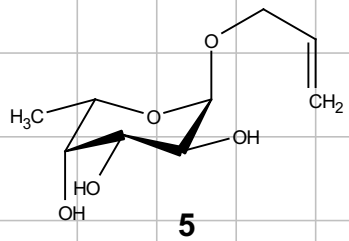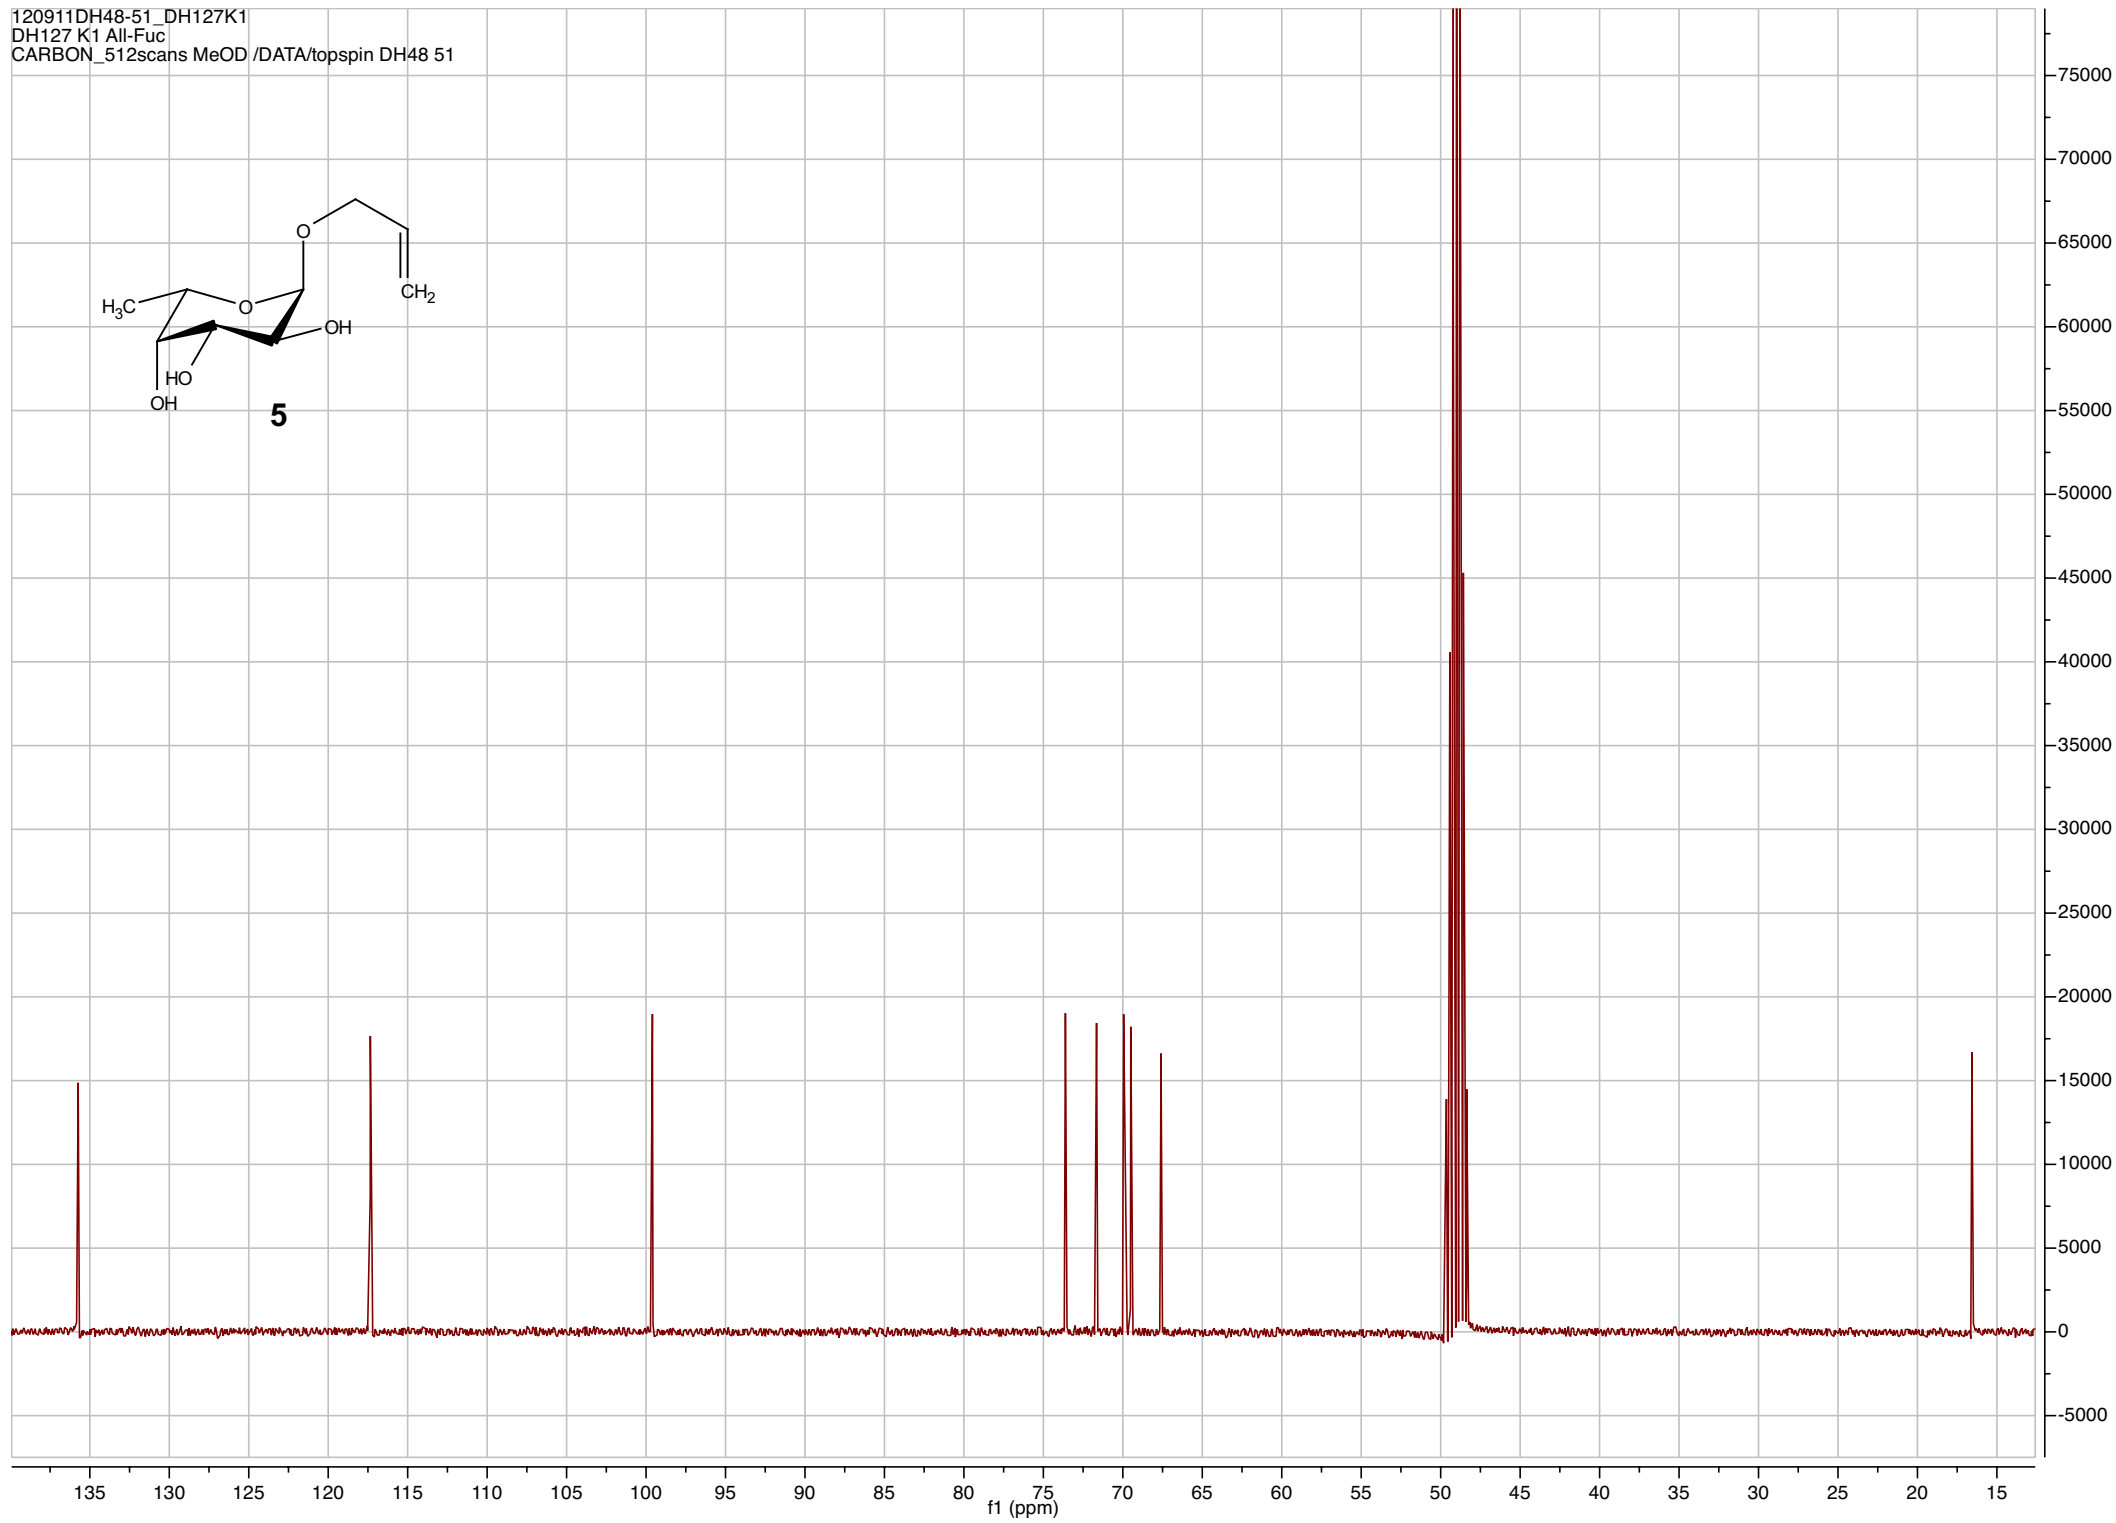

121115DH48-23\_DH118H  
DH118H  
PROTON CDCI3 /DATA/topspin DH48 23

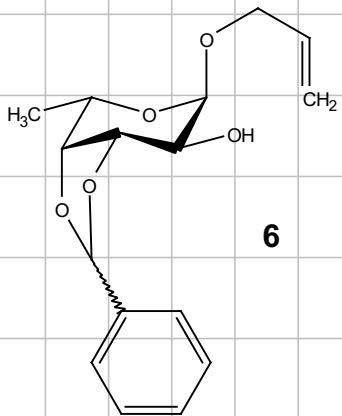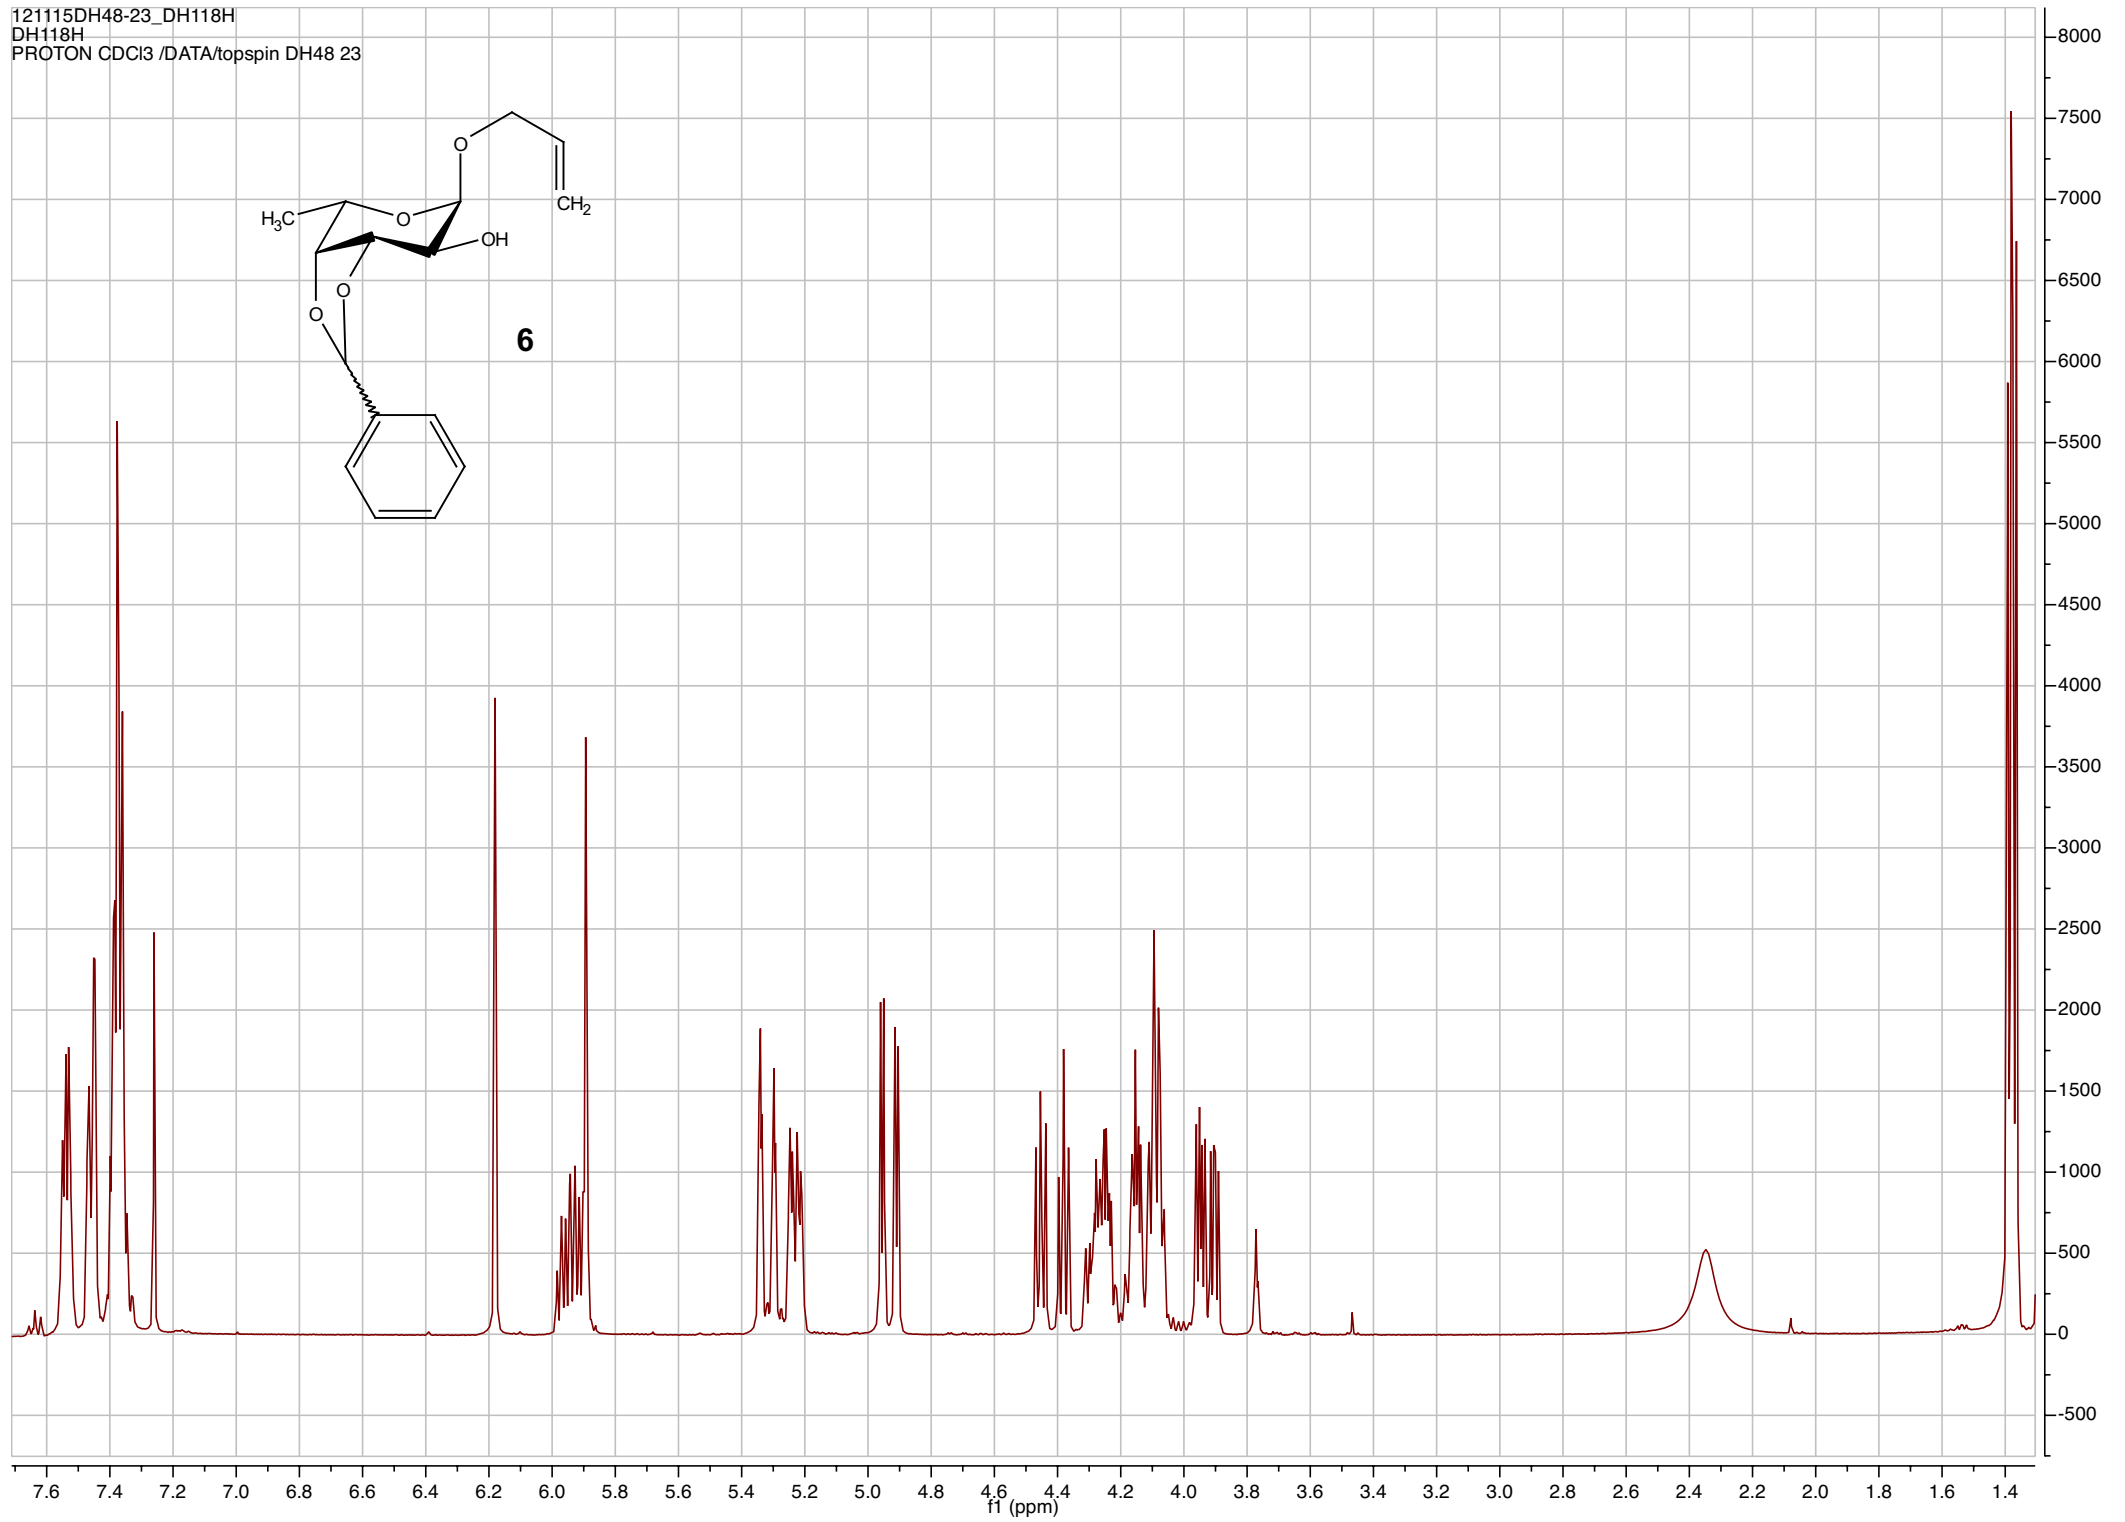

121115DH48-23\_DH118H  
DH118H  
CARBON\_256scans CDCI3 /DATA/topspin DH48 23

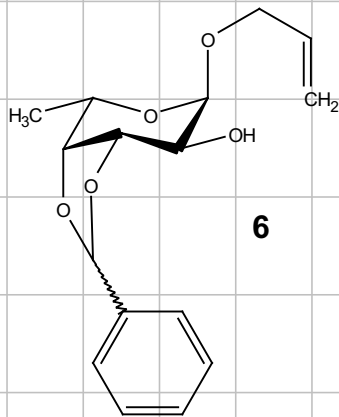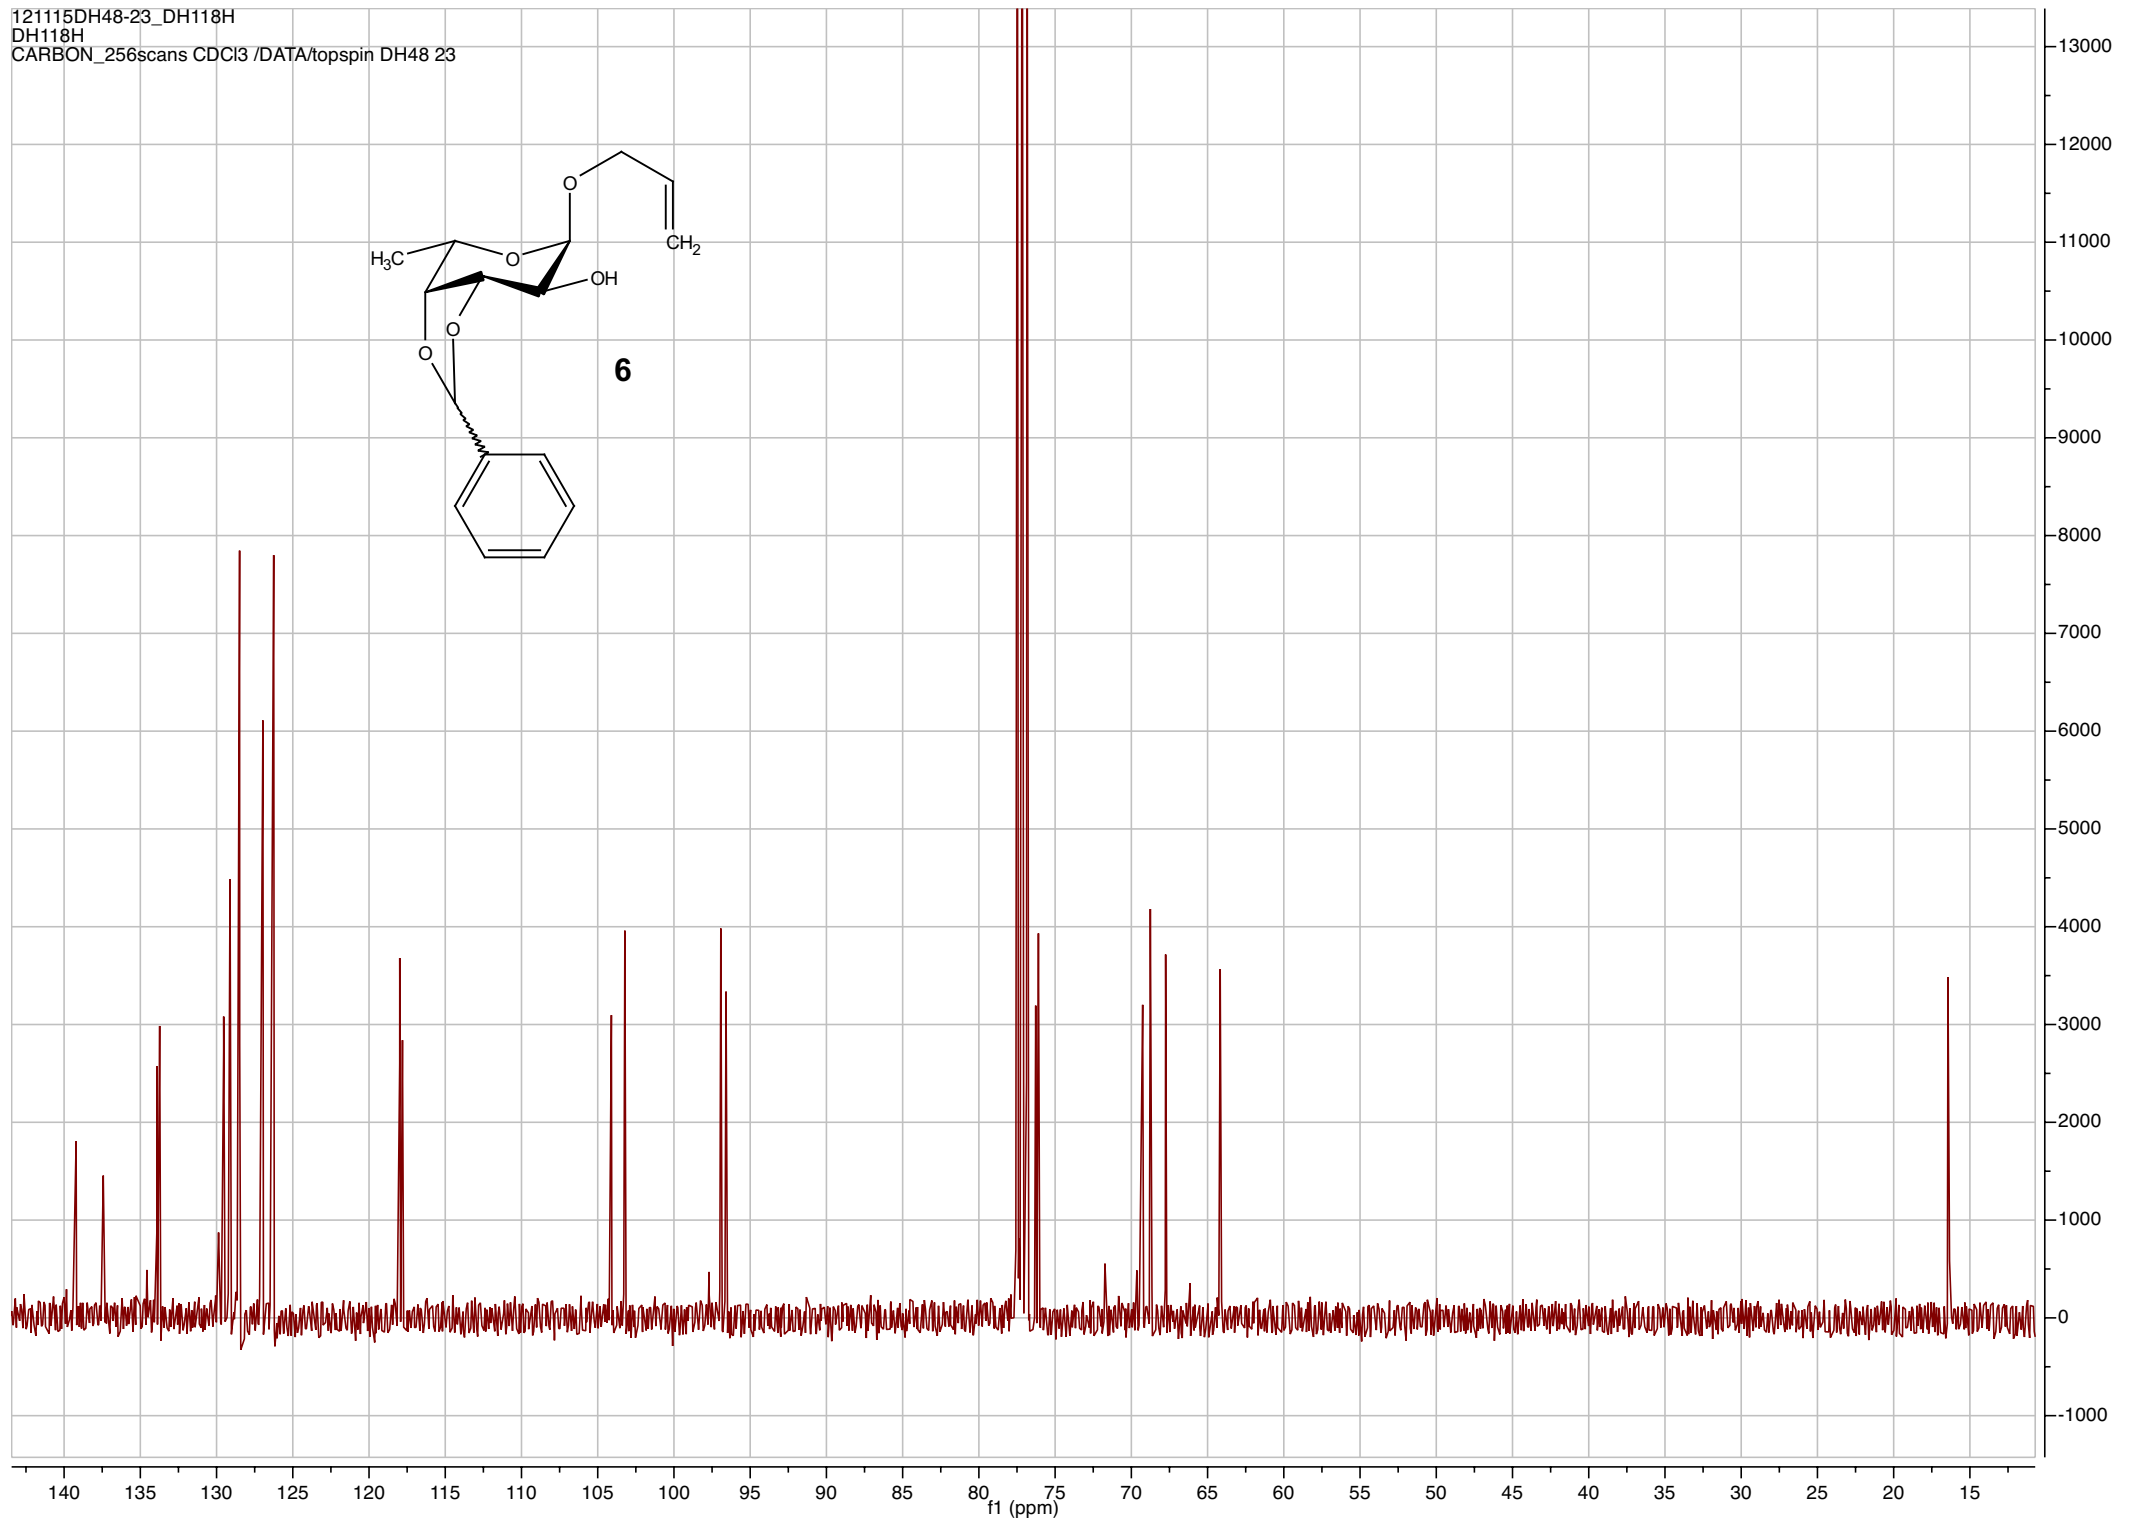



120725DH48-35\_DH119  
DH119 (1.Haelfte)  
PROTON CDCl3 /DATA/topspin DH48 35

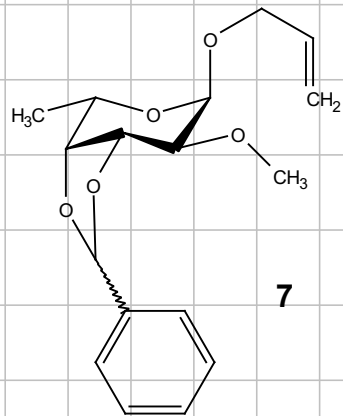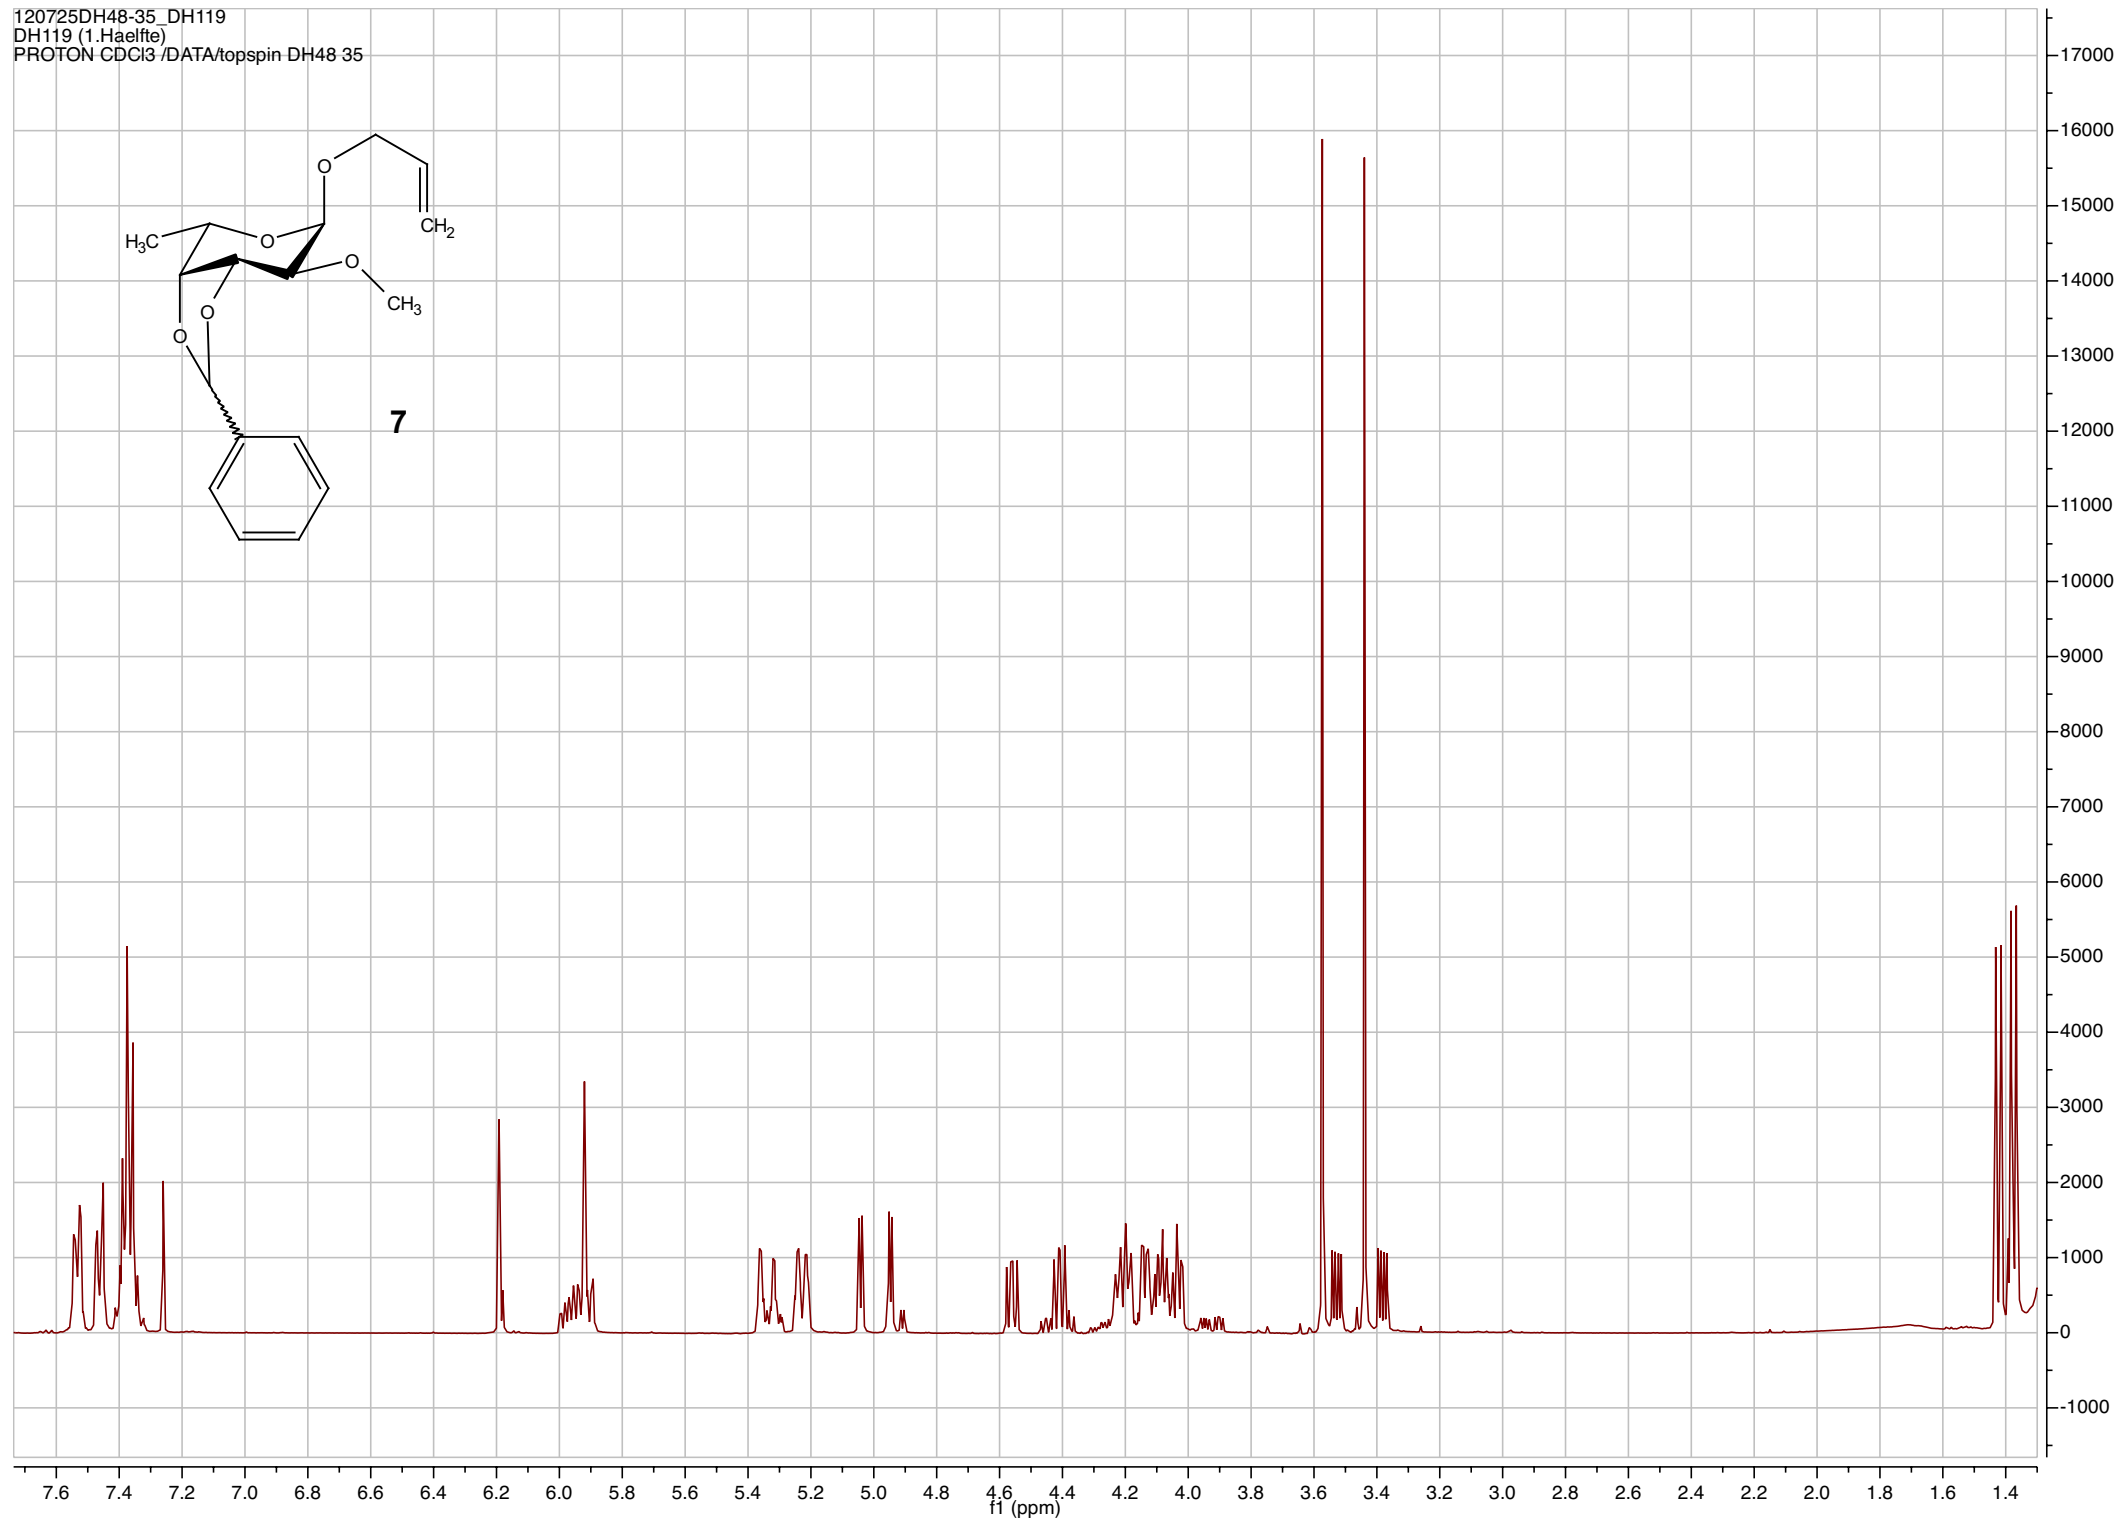

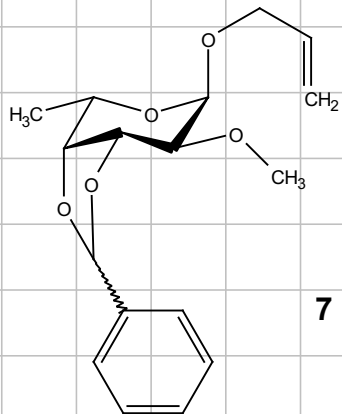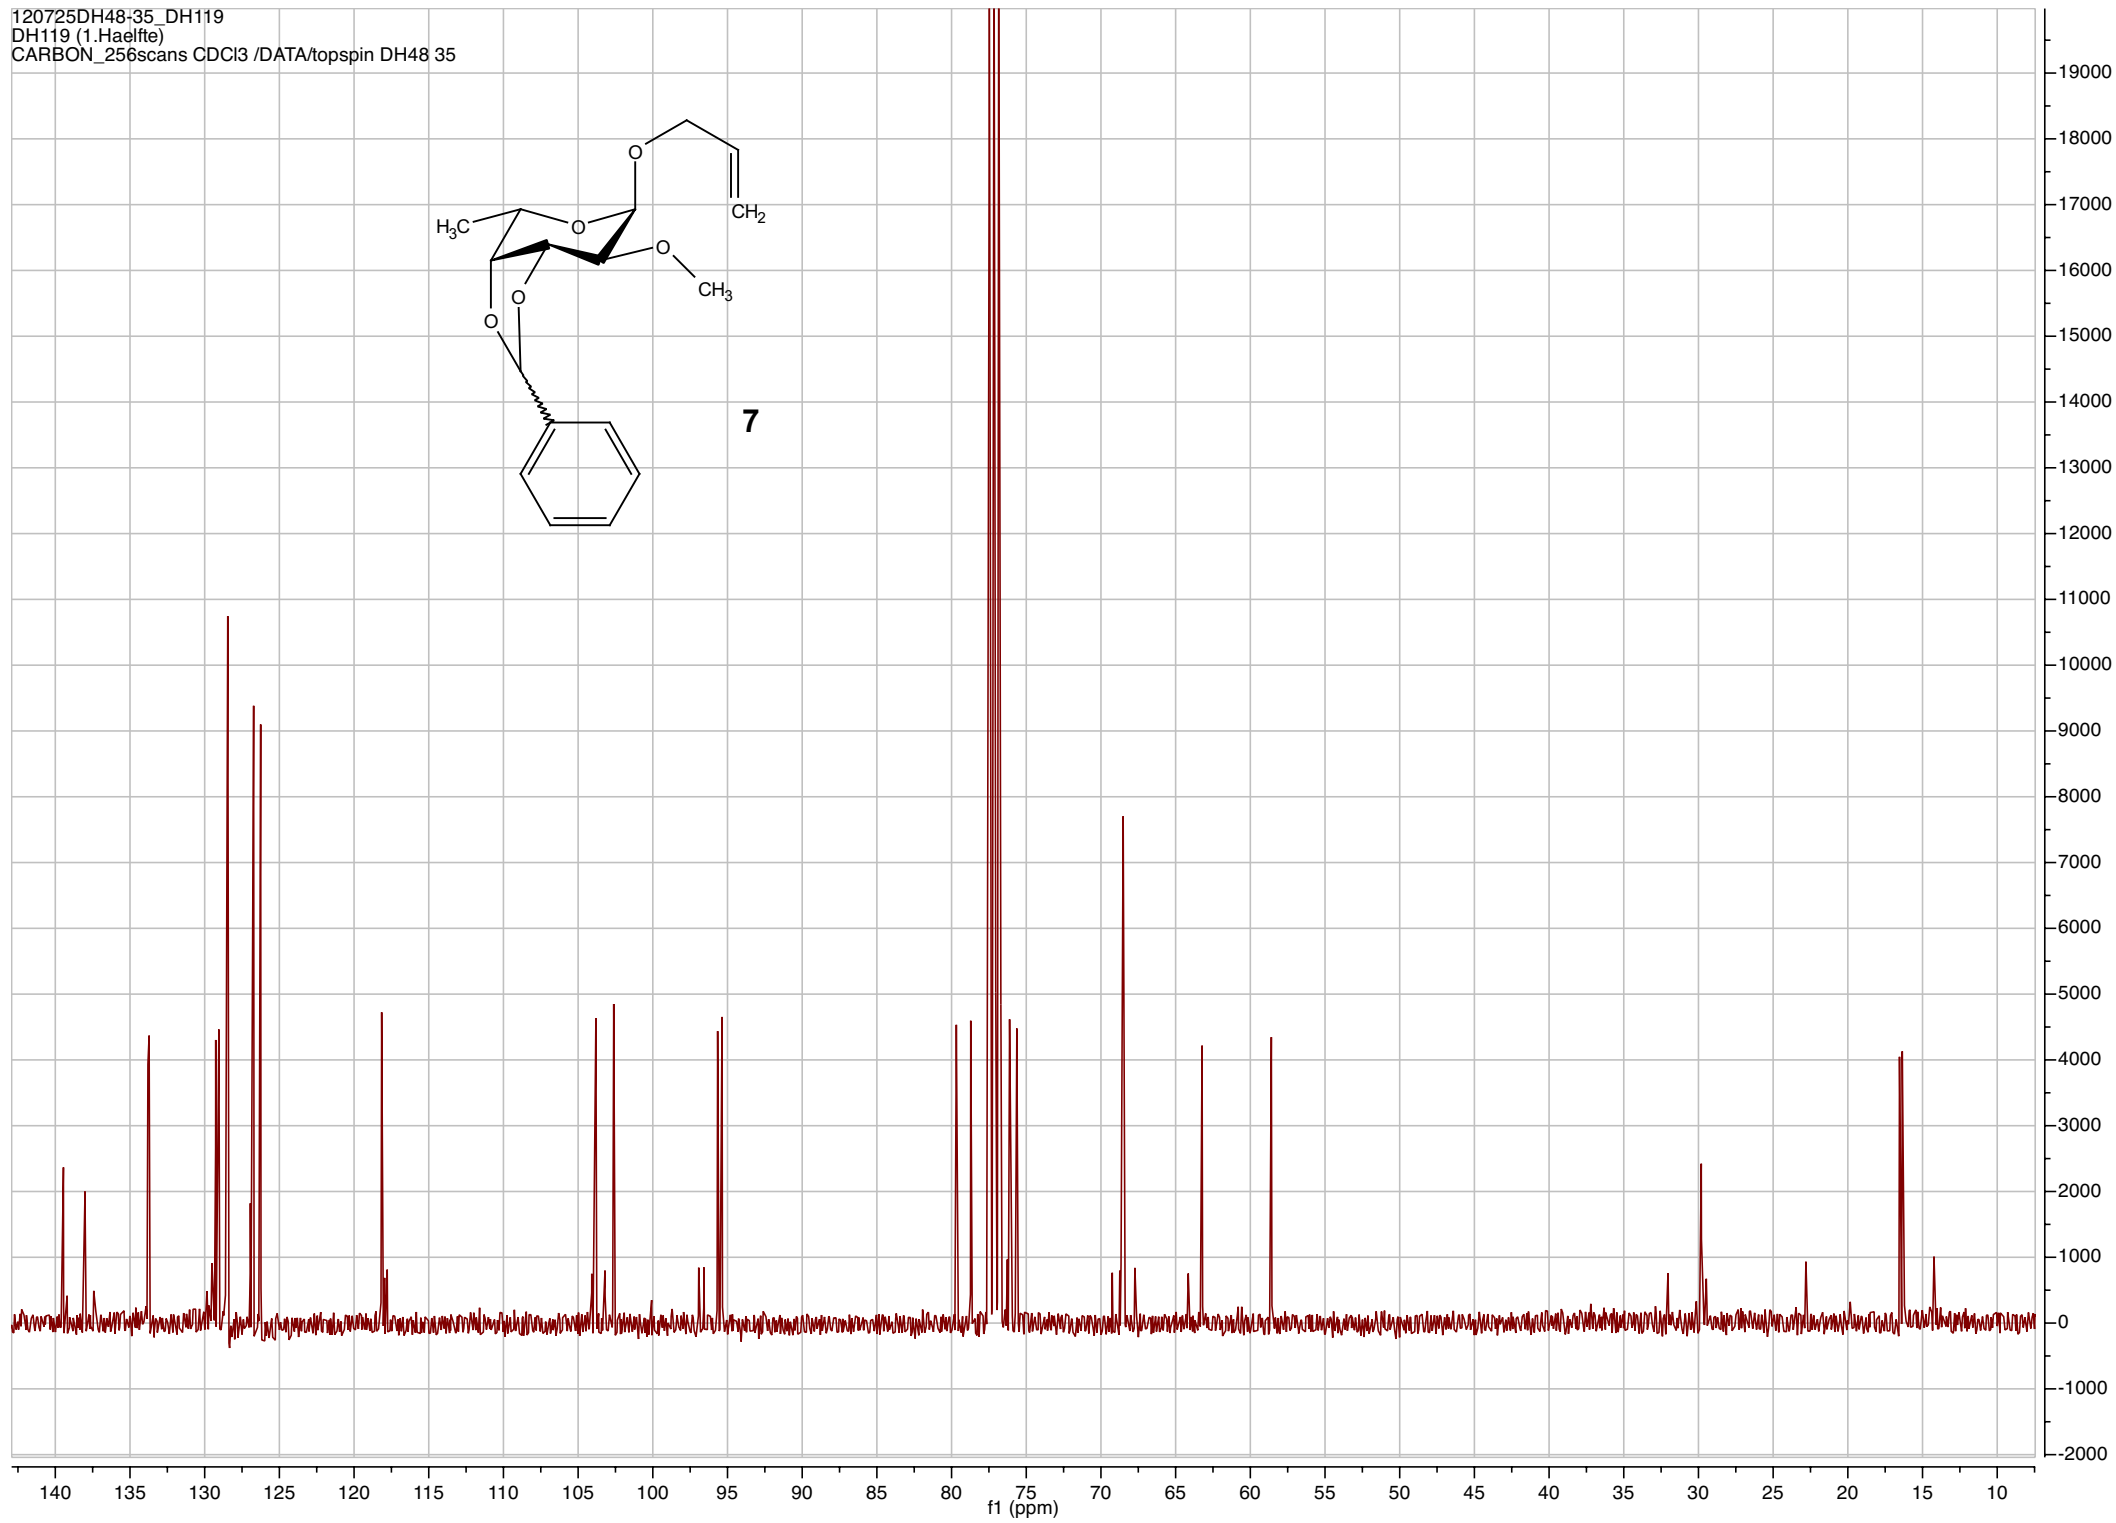

120806DH48-11\_DH120-2  
DH120-2 All 2-Me-Fuc  
PROTON MeOD /DATA/topspin DH48 11

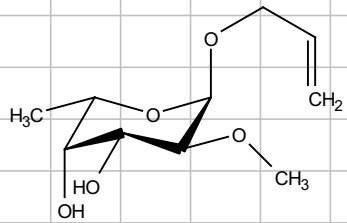

**8**

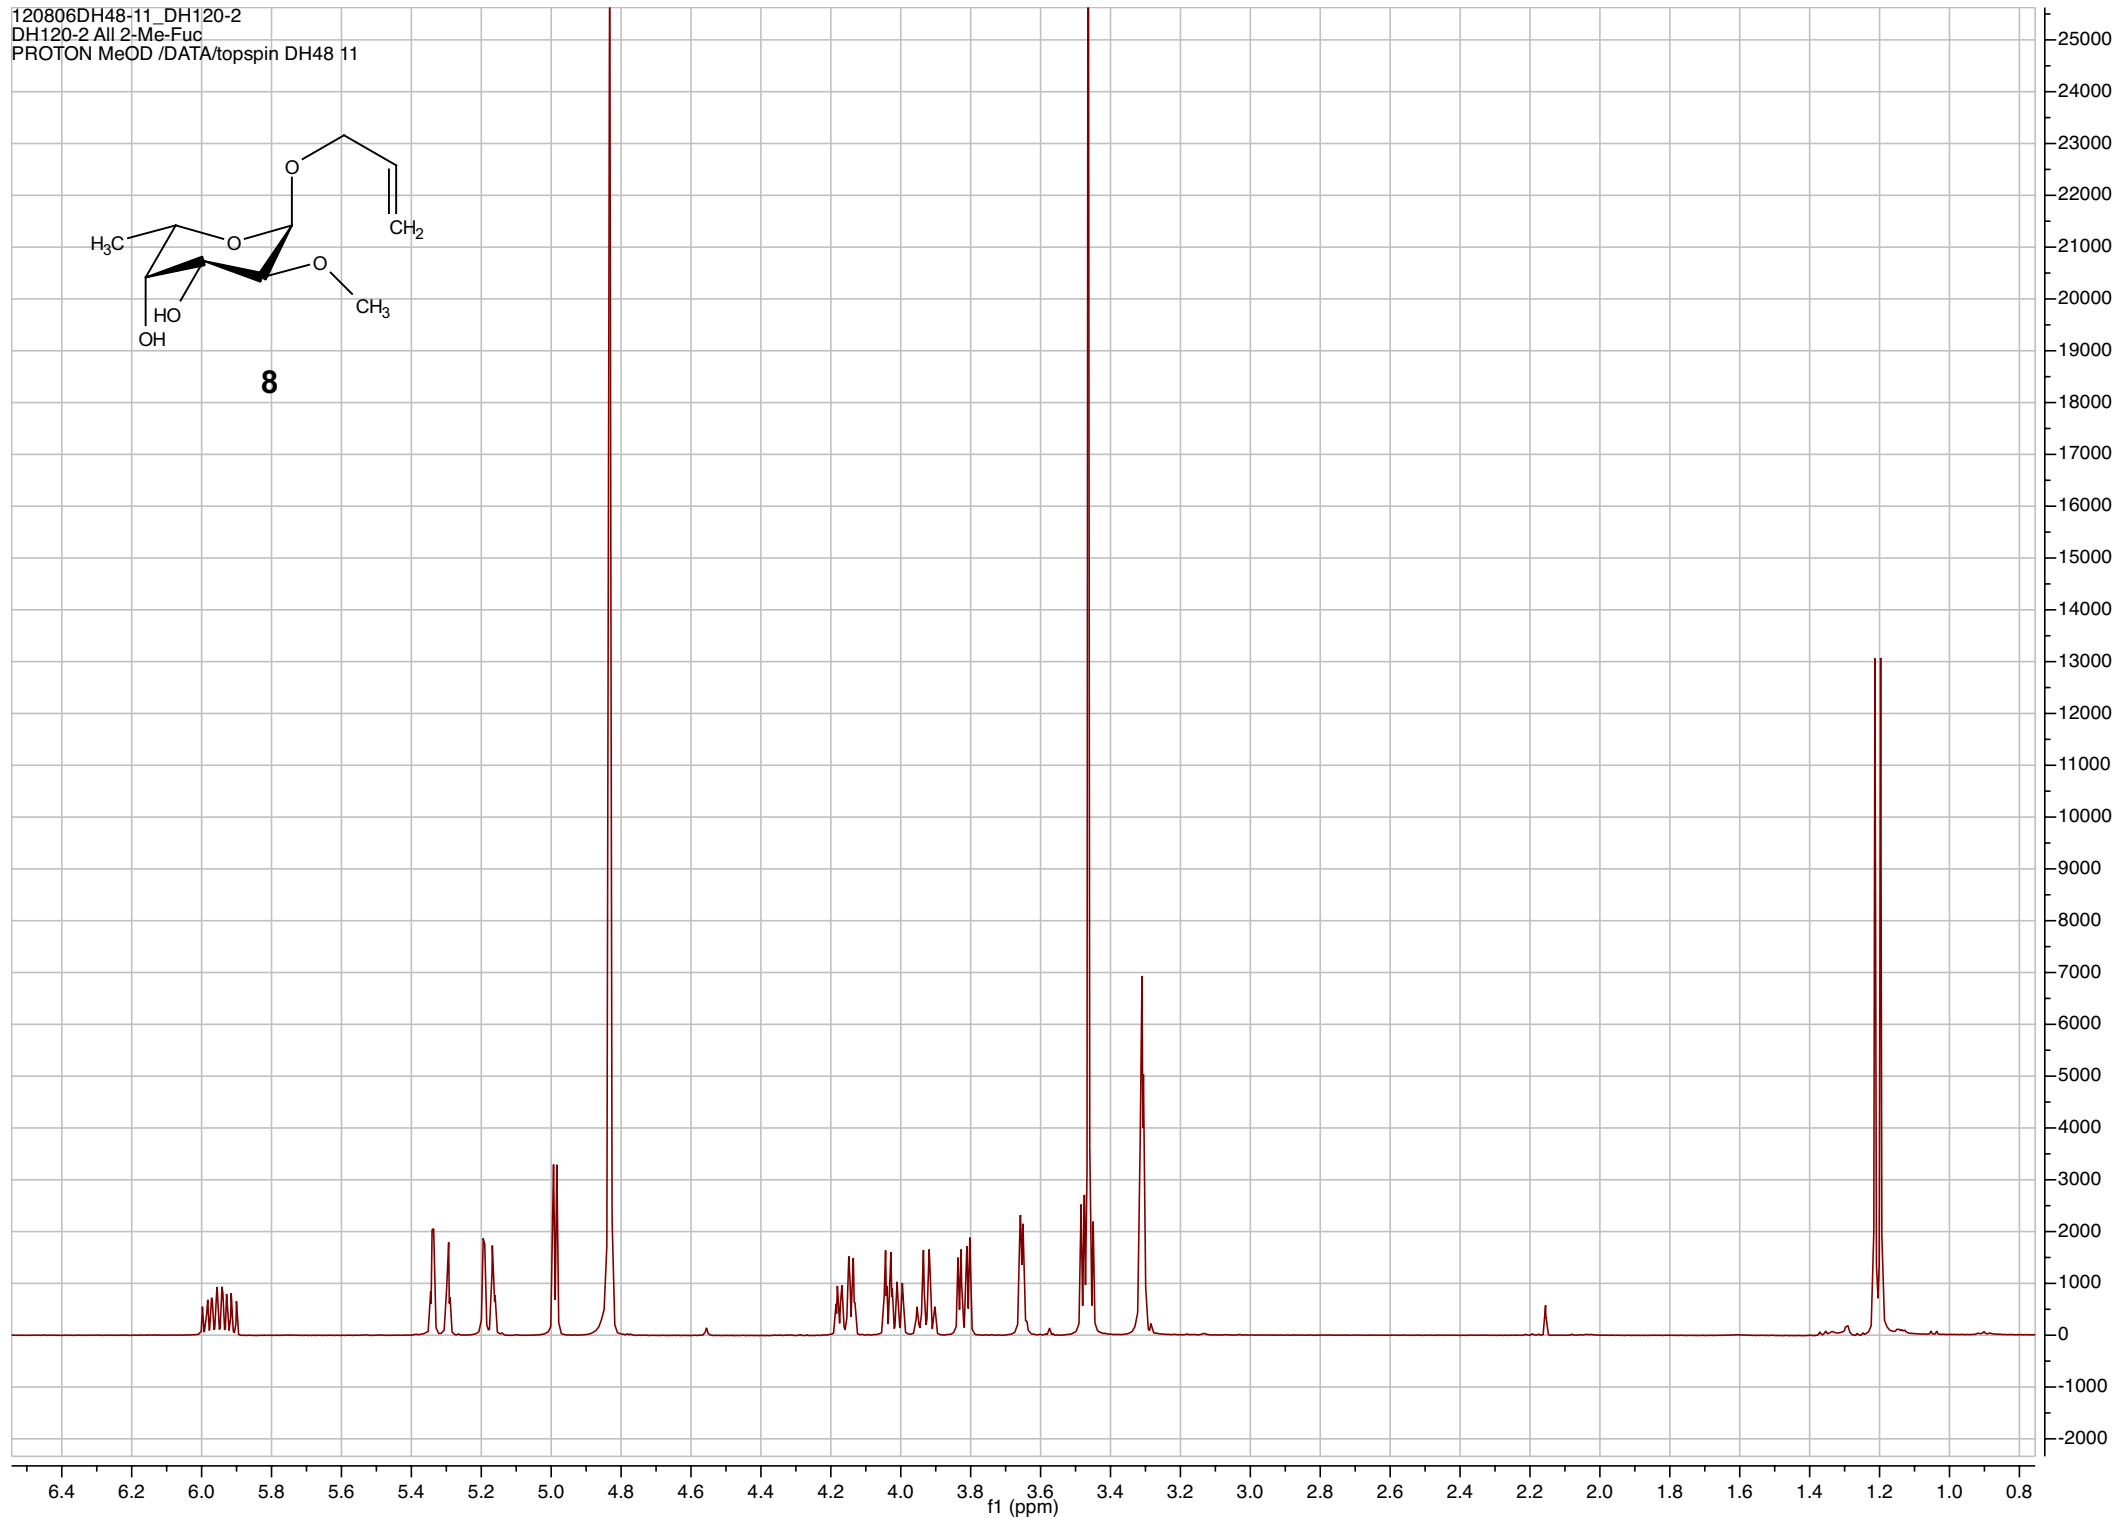

120806DH48-11\_DH120-2  
DH120-2 All 2-Me-Fuc  
CARBON\_1024scans MeOD /DATA/topspin DH48 11

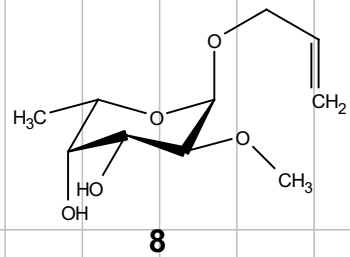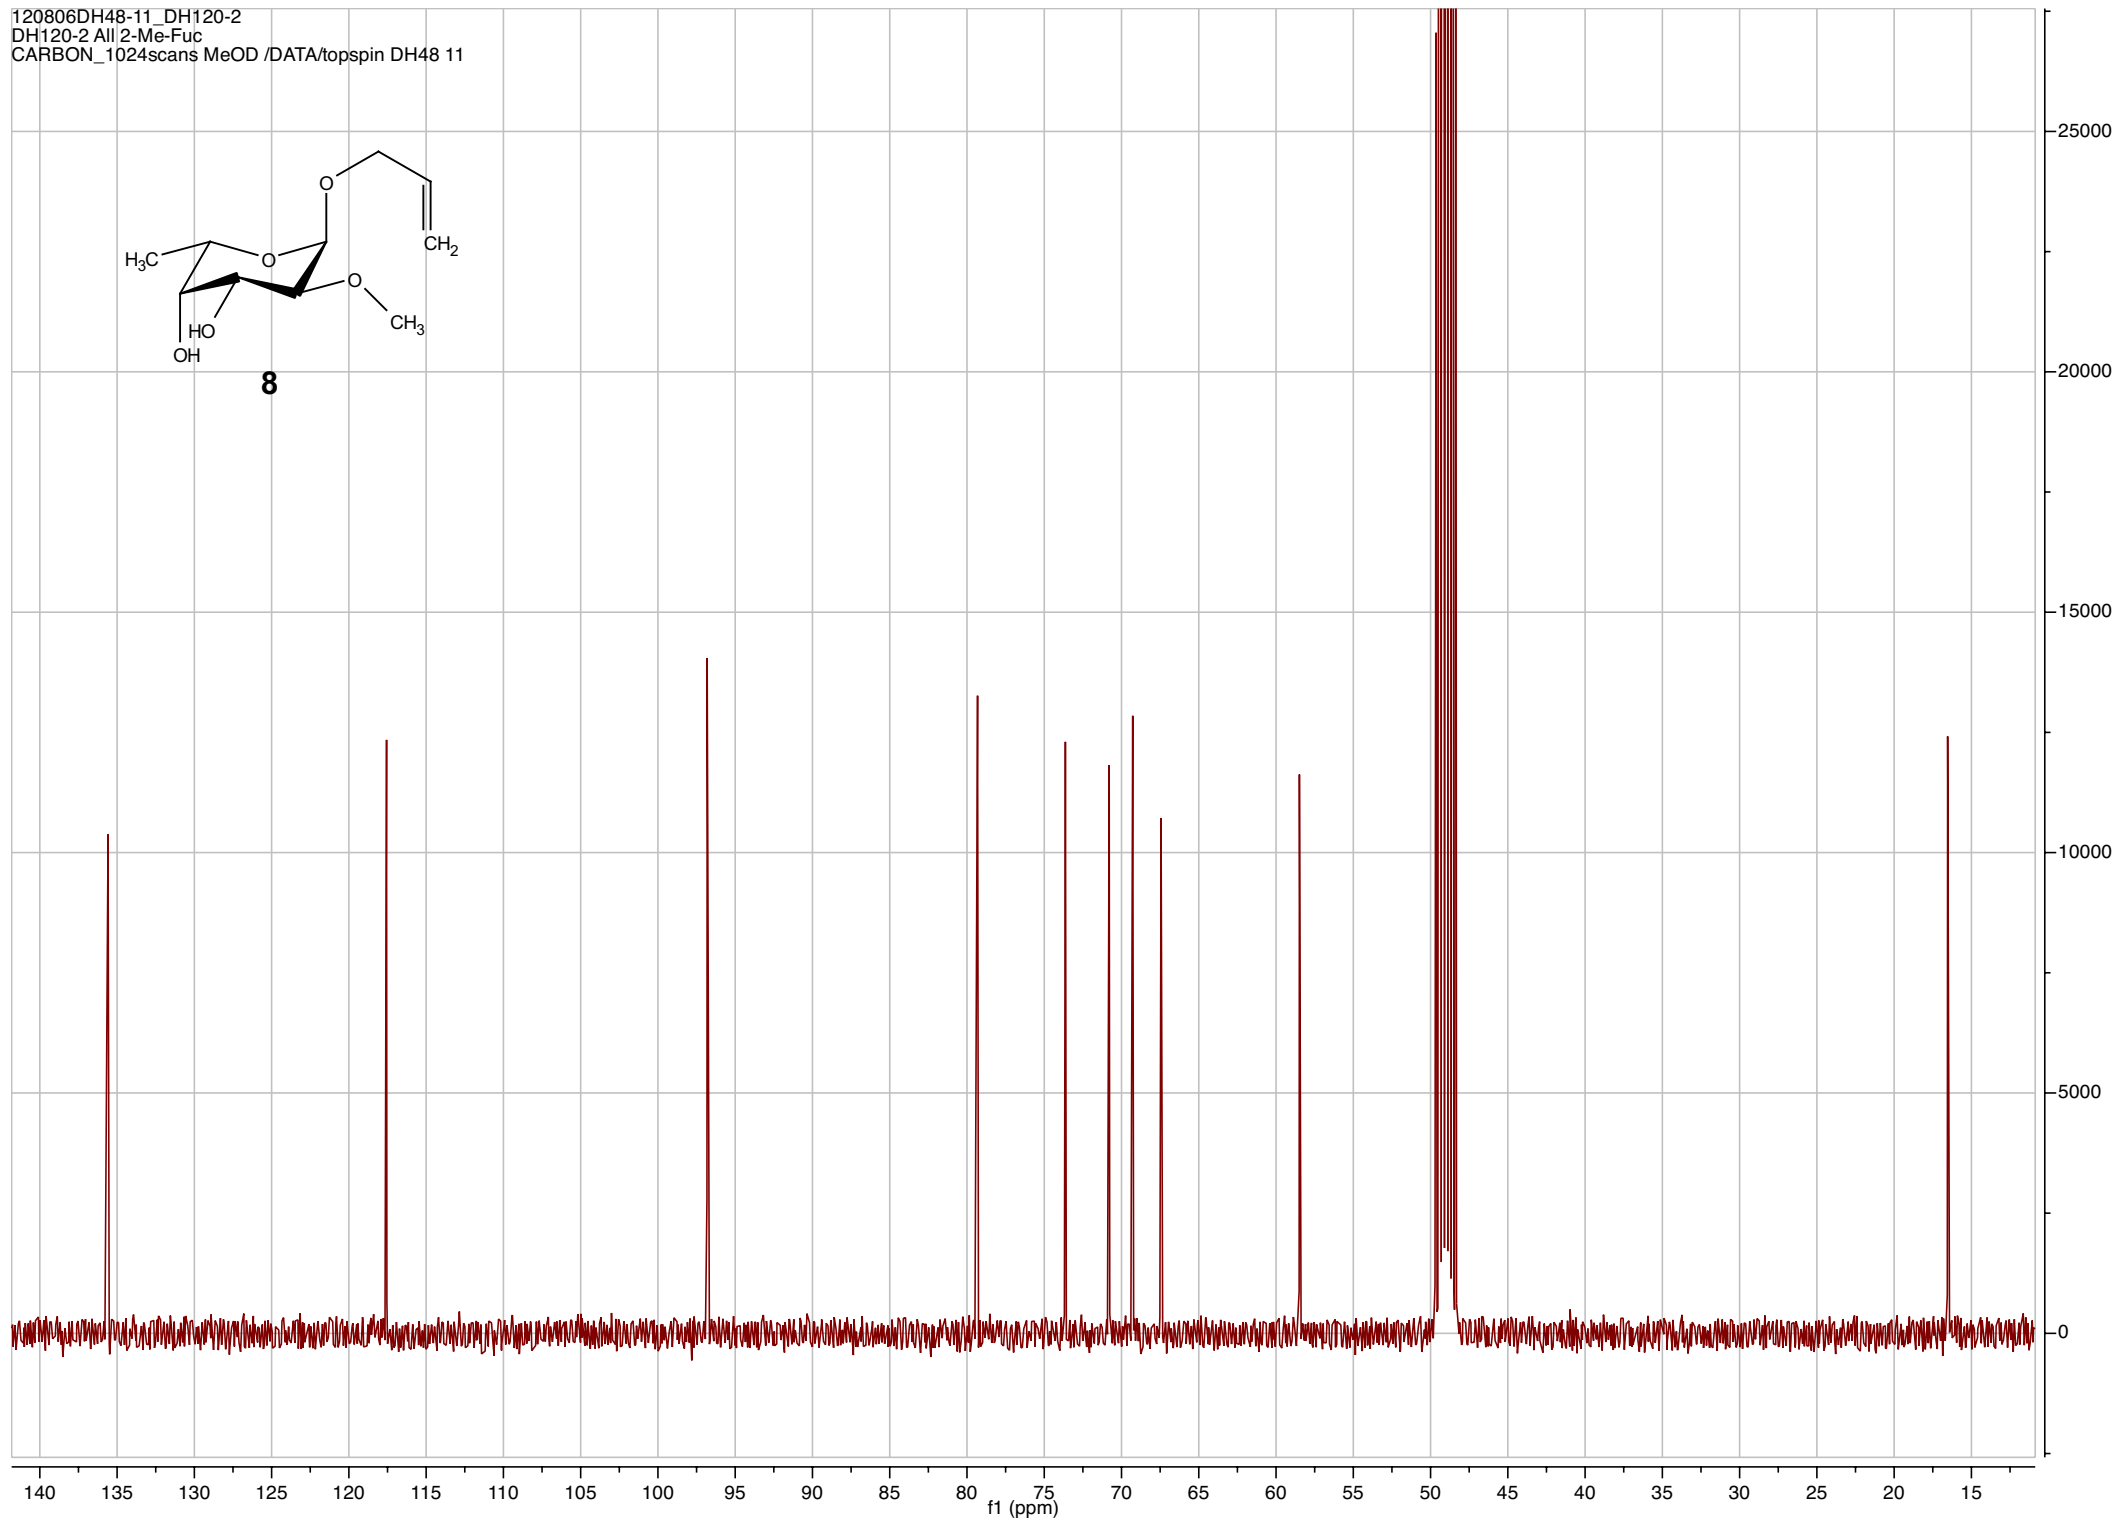

120920DH48-51DH128bFr1a  
DH128b Fr. 1a  
PROTON MeOD /DATA/topspin DH48 51

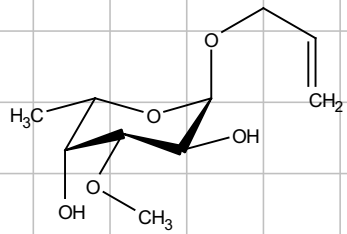

**9**

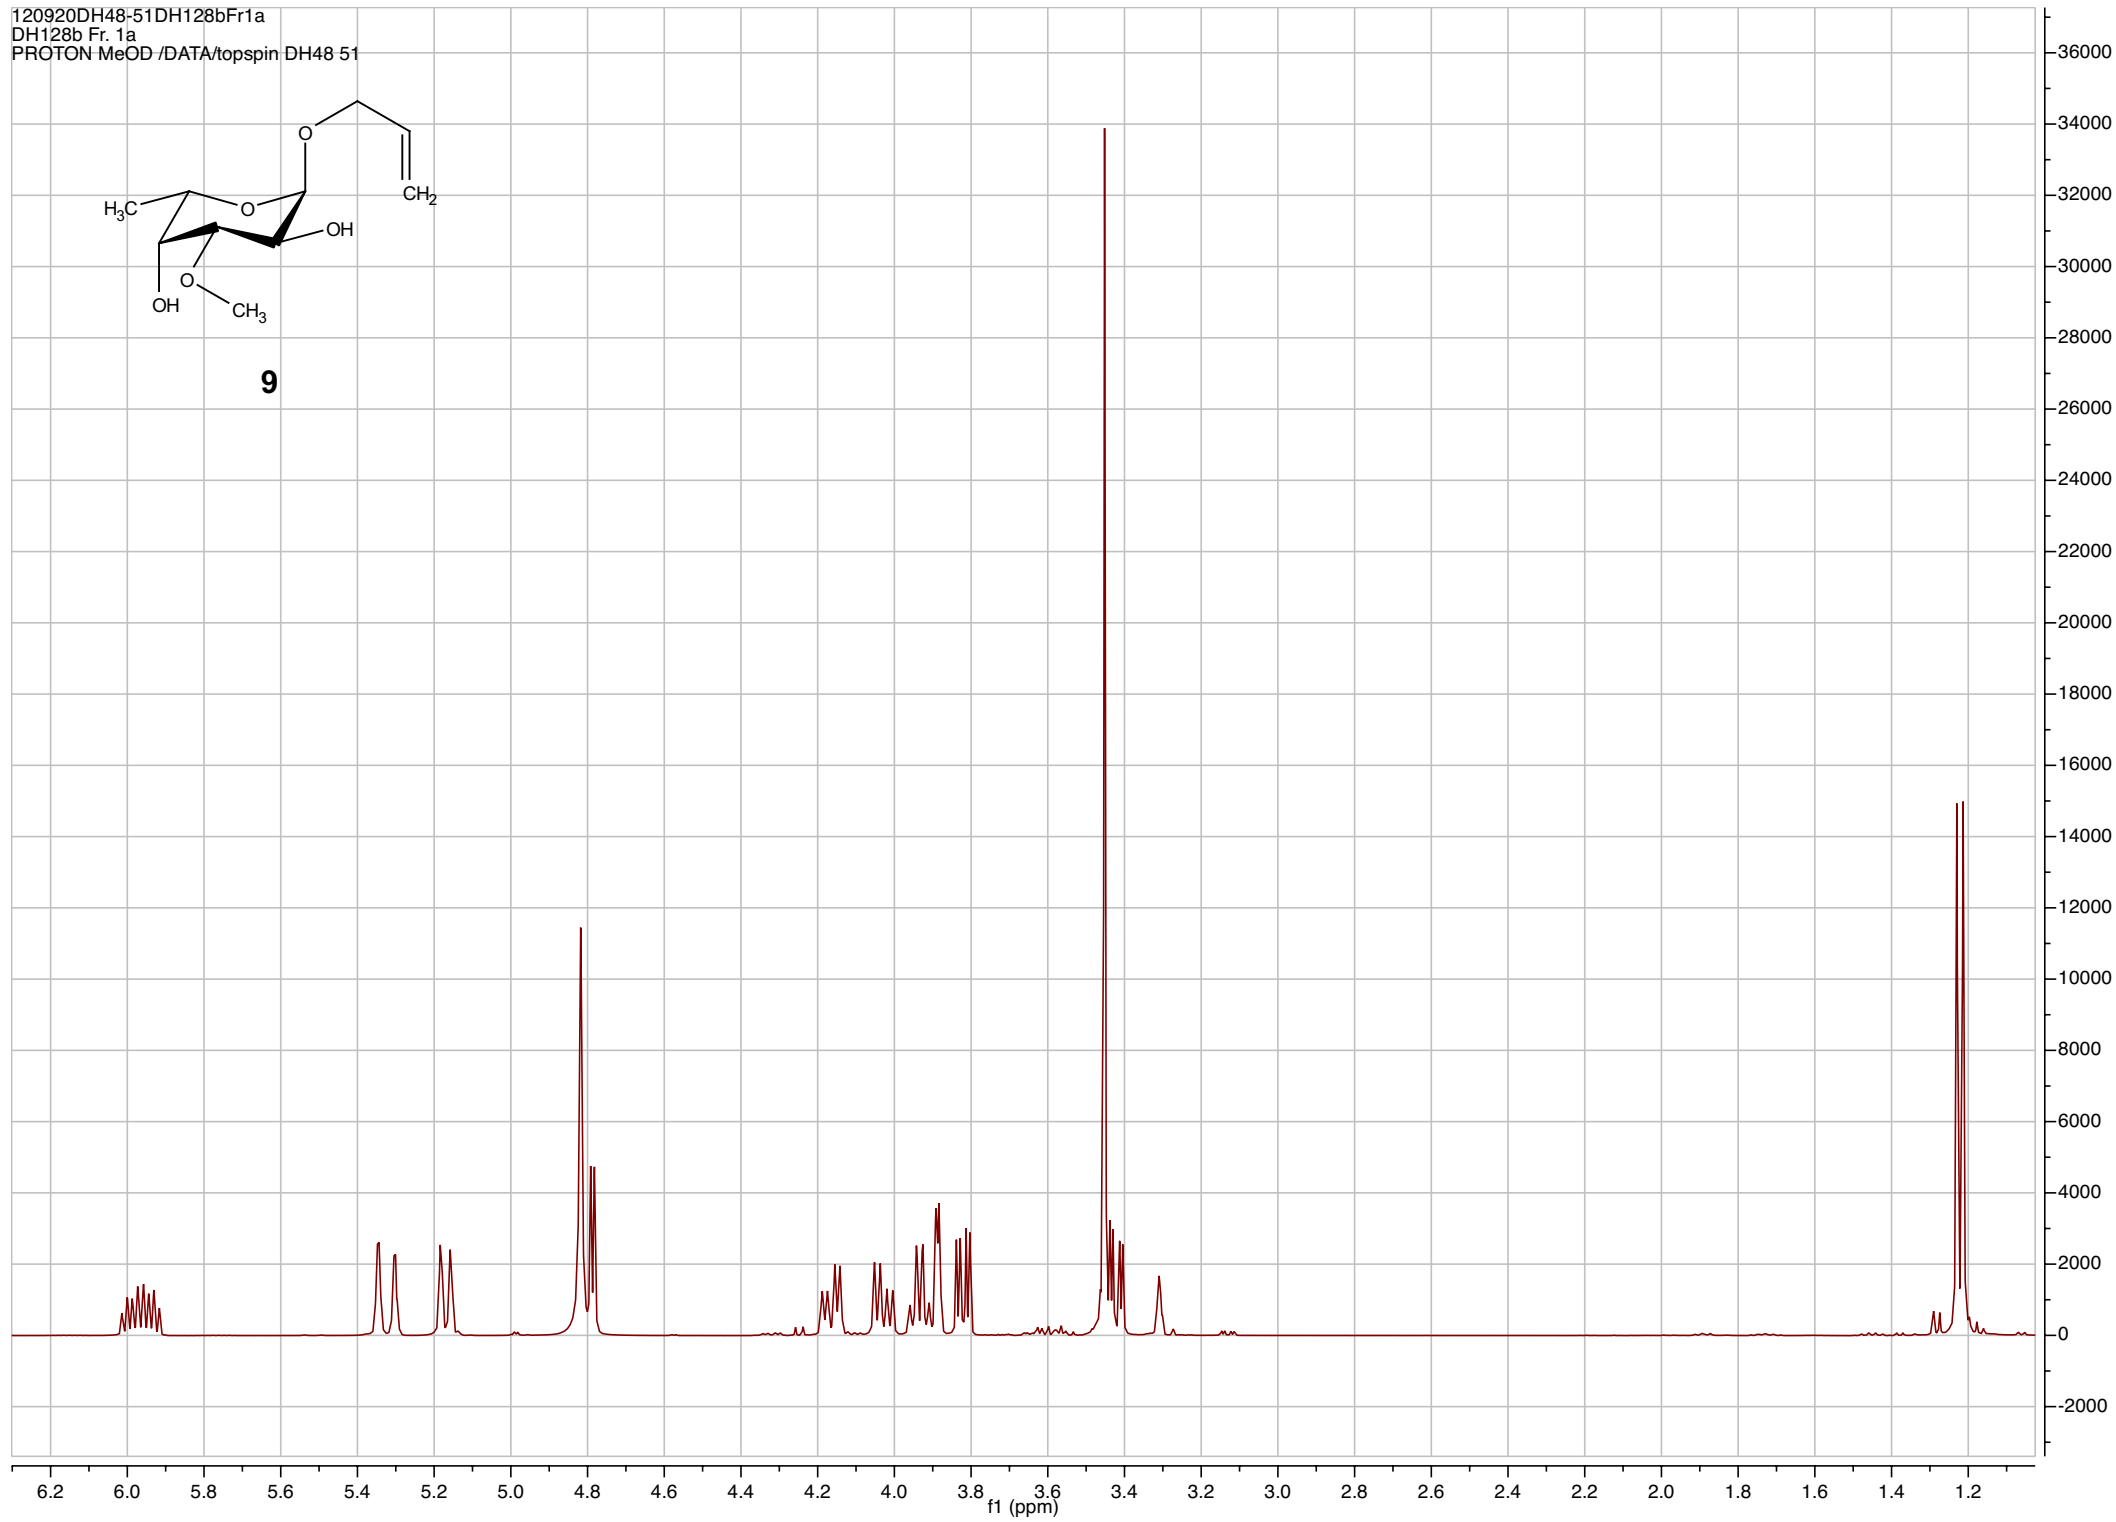

120920DH48-51DH128bFr1a  
DH128b Fr, 1a  
CARBON\_256scans MeOD /DATA/topspin DH48 51

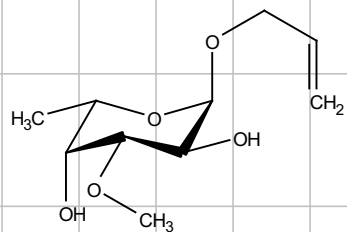

9

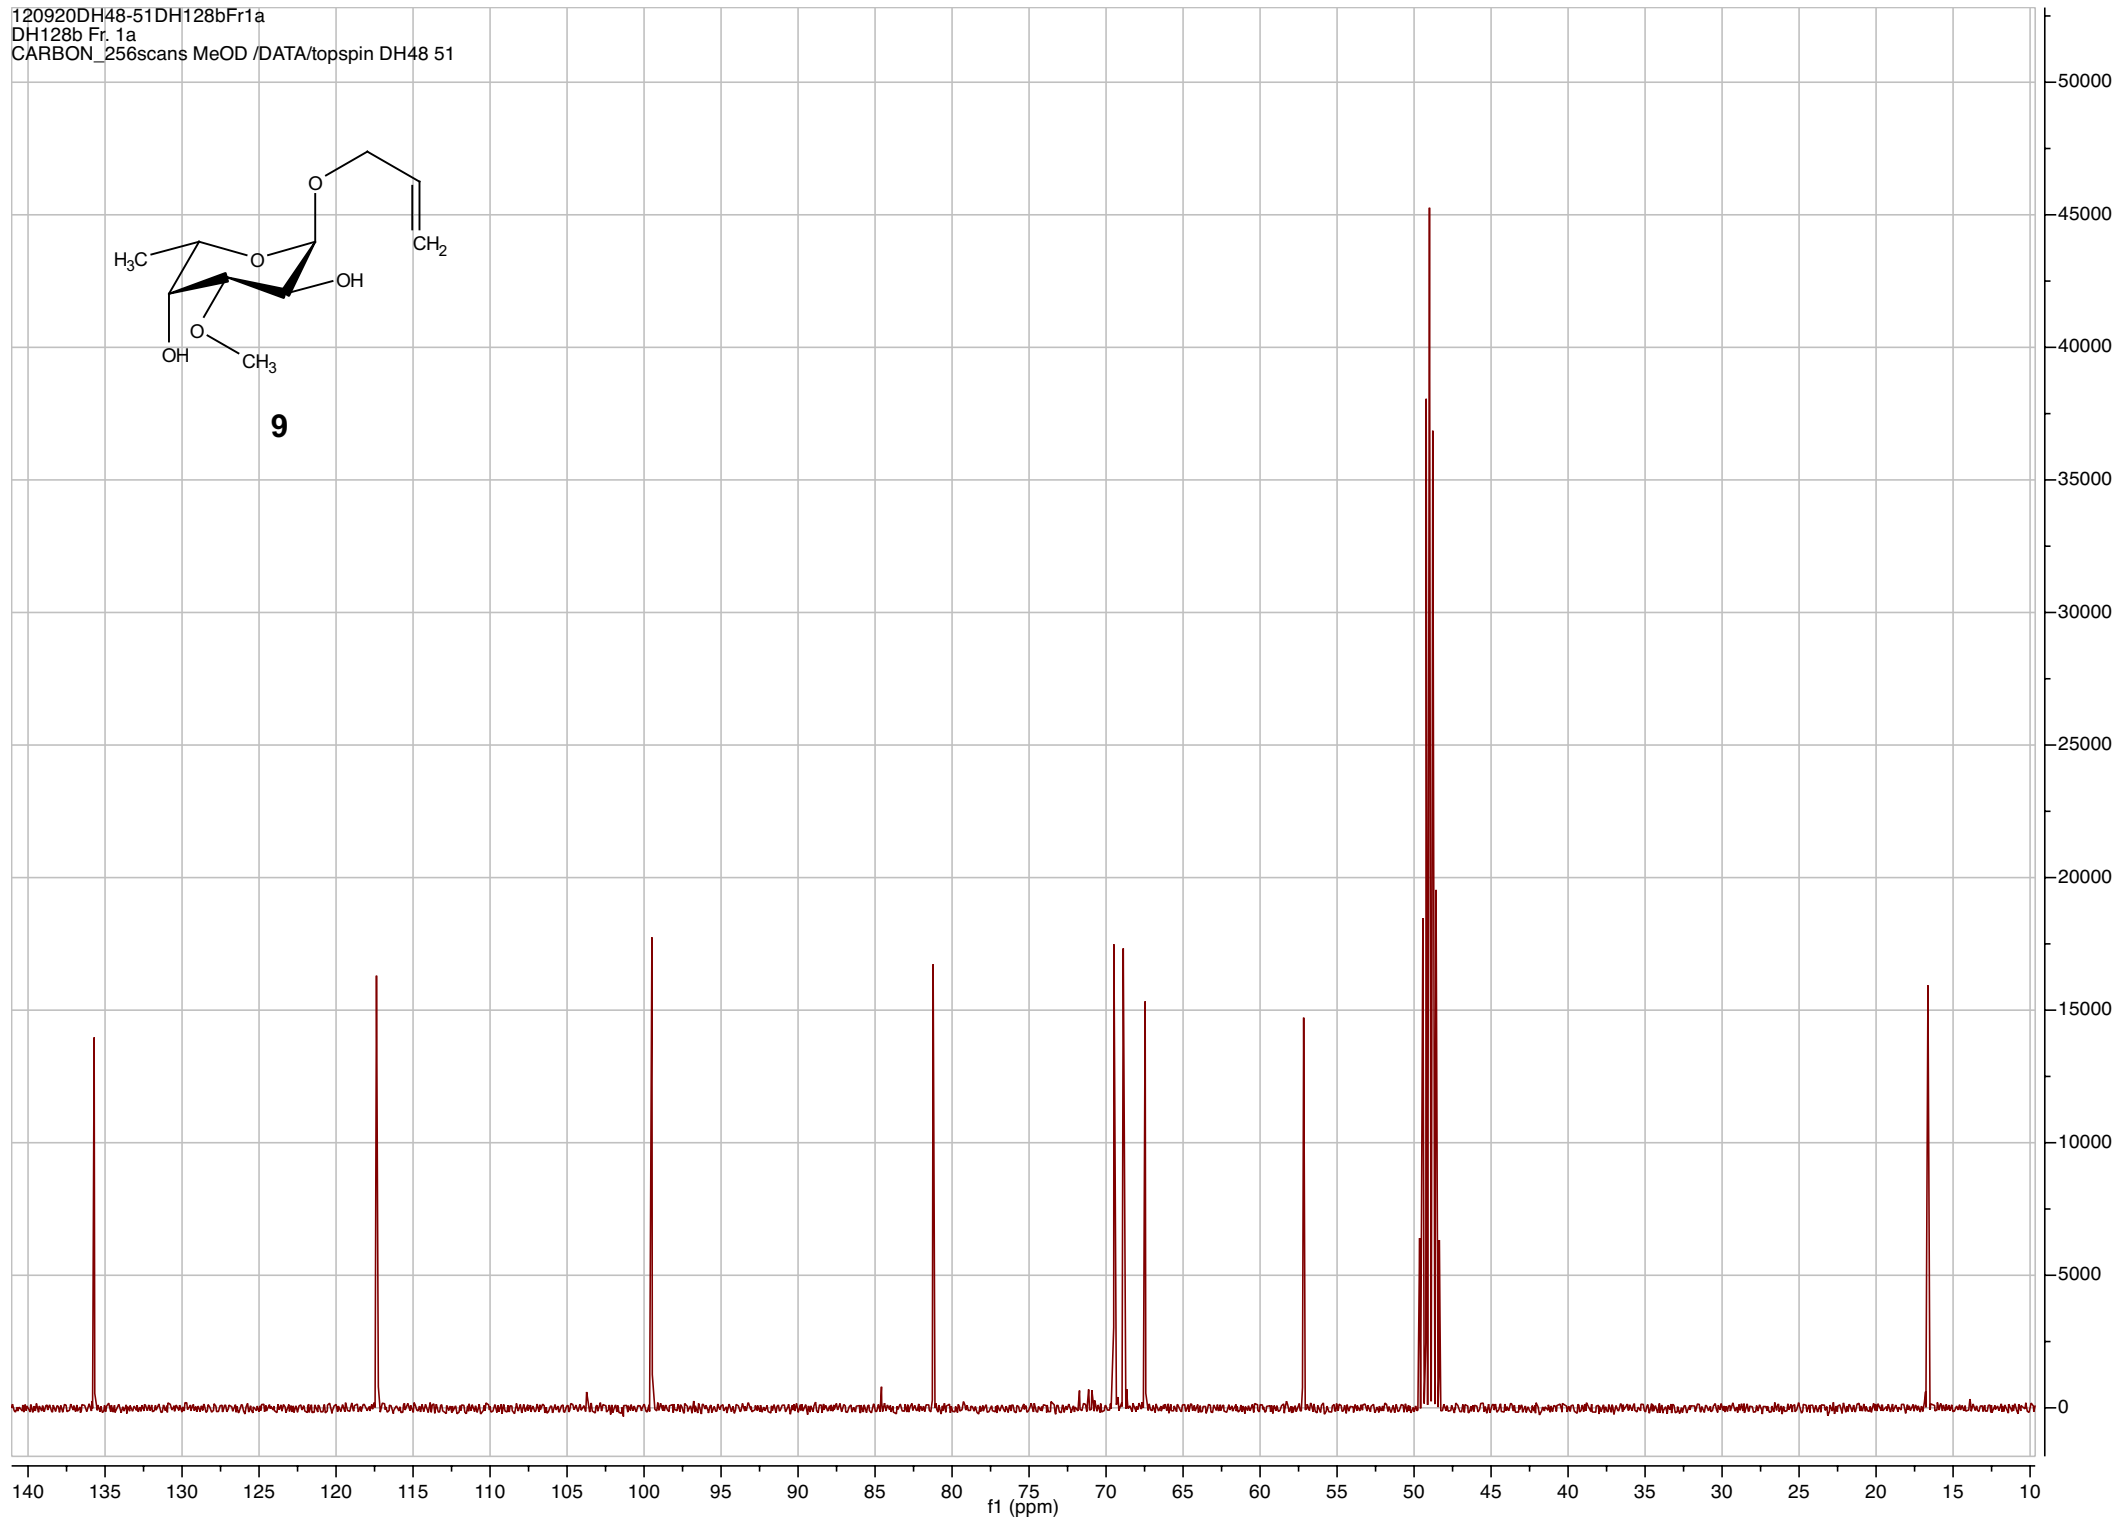

Supplement: 1401176111_pnas.1401176111.sd02.pdf [file 1401176111_pnas.1401176111.sd02.pdf]
