# Supplementary material
Source: PubMed Central journal article supplement (PMC4103367)
Supplement: 1401176111_pnas.201401176SI.pdf [file 1401176111_pnas.201401176SI.pdf]

# Supporting Information

Wohlschlager et al. 10.1073/pnas.1401176111

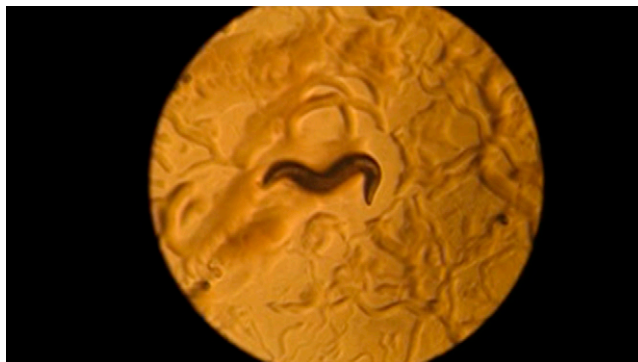

**Movie S1.** Locomotion of *Caenorhabditis elegans pmk-1(km25)* on a lawn of Lb-Tec2-expressing *Escherichia coli* BL21(DE3) cells on nematode growth medium (NGM) agar.

[Movie S1](#)

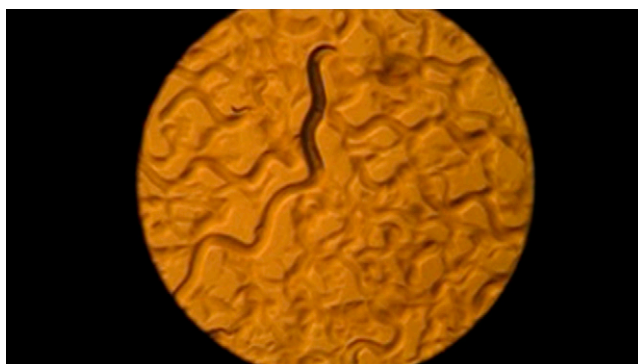

**Movie S2.** Locomotion of *C. elegans samt-1(op532)pmk-1(km25)* on a lawn of Lb-Tec2-expressing *E. coli* BL21(DE3) cells on NGM agar.

[Movie S2](#)

**Dataset S1.** Carbohydrate-binding specificity of Tectonin 2 of the mushroom *Laccaria bicolor* as determined by glycan array analysis

[Dataset S1](#)

The mammalian glycan array of the Consortium of Functional Glycomics was probed with 200  $\mu\text{g}/\text{mL}$  Alexa Fluor 488-labeled Tectonin 2 of the mushroom *L. bicolor* (Lb-Tec2).

**Dataset S2.** NMR spectra of synthetic compounds 2–9

[Dataset S2](#)

## Other Supporting Information Files

[SI Appendix \(PDF\)](#)
